# Supplementary material for: Antimicrobial Peptides as Potential Antiviral Factors in Insect Antiviral Immune Response
Source: Front Immunol. 2020 Sep 2;11:2030. doi: 10.3389/fimmu.2020.02030 (PMC7492552; doi:10.3389/fimmu.2020.02030)
Supplement: Supplementary File 1 — Antiviral activity prediction of all insect AMPs in the dbAMP database. [file Table_1.XLSX]

## Sheet: all
dbAMP ID	Name	Source	Prediction	AVP	Non.AVP
dbAMP_00031	Hymenoptaecin (Fragment)	Bombus terrestris [Buff-tailed bumblebee]	Non-AVP	0	1
dbAMP_00045	Defensin-1	Stomoxys calcitrans [Stable fly]	AVP	1	0
dbAMP_00060	Hymenoptaecin (Fragment)	Bombus terrestris [Buff-tailed bumblebee]	Non-AVP	0	1
dbAMP_00076	Phormicin precursor	Protophormia terraenovae [Northern blowfly]	Non-AVP	0.326	0.674
dbAMP_00087	Termicin	Pseudacanthotermes spiniger	AVP	0.98	0.02
dbAMP_00173	Attacin	Anopheles albimanus [New world malaria mosquito]	Non-AVP	0.47	0.53
dbAMP_00186	Attacin, partial	Spodoptera exigua [Beet armyworm]	Non-AVP	0.08	0.92
dbAMP_00218	CECB_DROSE Cecropin-B precursor&&Cecropin-B	Drosophila sechellia [Fruit fly]&&Drosophila simulans [Fruit fly]&&Drosophila mauritiana [Fruit fly]	Non-AVP	0.498	0.502
dbAMP_00221	Defensin precursor	Oryctes rhinoceros [Coconut rhinoceros beetle]	AVP	0.962	0.038
dbAMP_00294	Moricin	Antheraea pernyi [Chinese oak silk moth]	AVP	0.772	0.228
dbAMP_00295	Moricin	Bombyx mori [Silk moth]	AVP	0.828	0.172
dbAMP_00296	Moricin-1, Moricin-2	Bombyx mori [Silk moth]	AVP	0.964	0.036
dbAMP_00343	Dinoponeratoxin Da-1585	Dinoponera australis [Giant neotropical hunting ant]	Non-AVP	0.43	0.57
dbAMP_00416	Moricin II	Hyblaea puera [Teak defoliator]	AVP	0.818	0.182
dbAMP_00479	Cecropin-B	Anopheles gambiae [African malaria mosquito]	AVP	1	0
dbAMP_00532	Nahymenoptaecin-1 precursor	Nasonia vitripennis [Parasitic wasp]	Non-AVP	0	1
dbAMP_00599	Defensin	Palomena prasina [Green shield bug]	Non-AVP	0.294	0.706
dbAMP_00600	Defensin	Pyrrhocoris apterus [Sap sucking bug]	Non-AVP	0.272	0.728
dbAMP_00603	Def-Aaa From The Insect Anopheles Gambiae	Anopheles gambiae [African malaria mosquito]	Non-AVP	0.012	0.988
dbAMP_00608	RprDefA	Rhodnius prolixus [Triatomid bug]	AVP	0.696	0.304
dbAMP_00609	RprDefC	Rhodnius prolixus [Triatomid bug]	Non-AVP	0.146	0.854
dbAMP_00610	Defensin	Phlebotomus duboscqi [Sandfly]	AVP	0.808	0.192
dbAMP_00611	RprDefB	Rhodnius prolixus [Triatomid bug]	Non-AVP	0.106	0.894
dbAMP_00612	AalDefD	Aedes albopictus [Asian tiger mosquito]	Non-AVP	0.466	0.534
dbAMP_00613	Defensin-A	Aedes aegypti [Yellowfever mosquito]	Non-AVP	0.072	0.928
dbAMP_00614	Defensin-B	Aedes aegypti [Yellowfever mosquito]	AVP	0.676	0.324
dbAMP_00615	Defensin-C	Aedes aegypti [Yellowfever mosquito]	AVP	0.524	0.476
dbAMP_00616	Sapecin-C	Sarcophaga peregrina [Flesh fly]	AVP	0.668	0.332
dbAMP_00619	Sapecin	Sarcophaga peregrina [Flesh fly]	Non-AVP	0.326	0.674
dbAMP_00620	Phormia defensin A	Phormia terranovae [Northern blowfly]	AVP	0.704	0.296
dbAMP_00621	Phormicin peptide B	Phormia terranovae [Northern blowfly]	Non-AVP	0	1
dbAMP_00622	Lucifensin	Lucilia sericata [Green bottle fly]	AVP	0.744	0.256
dbAMP_00624	Defensin	Drosophila melanogaster [Fruit fly]	AVP	1	0
dbAMP_00625	Defensin 2a	Stomoxys calcitrans [Stable fly]	AVP	0.588	0.412
dbAMP_00626	Smd2	Stomoxys calcitrans [Stable fly]	Non-AVP	0.018	0.982
dbAMP_00679	Locusta migratoria	Locusta migratoria [Migratory locust]	AVP	0.828	0.172
dbAMP_00737	Diapause-specific peptide	Gastrophysa atrocyanea [Leaf beetle]	AVP	0.64	0.36
dbAMP_00775	Abaecin (Fragment)	Apis mellifera [Honeybee]	Non-AVP	0.4	0.6
dbAMP_00856	Psacotheasin	Psacothea hilaris [Yellow star longhorn beetle]	Non-AVP	0.4	0.6
dbAMP_00857	Antimicrobial peptide Alo-2	Acrocinus longimanus [Giant harlequin beetle]	AVP	0.64	0.36
dbAMP_00860	Antimicrobial peptide Alo-1	Acrocinus longimanus [Giant harlequin beetle]	AVP	0.64	0.36
dbAMP_00861	Antimicrobial peptide Alo-3	Acrocinus longimanus [Giant harlequin beetle]	AVP	0.506	0.494
dbAMP_00862	Alo-3	Acrocinus longimanus [Giant harlequin beetle]	AVP	0.506	0.494
dbAMP_00887	Drosomycin	Drosophila melanogaster [Fruit fly]	AVP	0.994	0.006
dbAMP_00900	Beta-defensin (Fragment)	Spinus spinus [Eurasian siskin]&&Carduelis flammea [Common redpoll]	AVP	0.726	0.274
dbAMP_00974	Attacin-E	Hyalophora cecropia [Cecropia moth]	Non-AVP	0.006	0.994
dbAMP_00975	Defense protein 3	Lonomia obliqua [Moth]	Non-AVP	0.45	0.55
dbAMP_00987	Drosomycin	Drosophila melanogaster [Fruit fly]	Non-AVP	0.47	0.53
dbAMP_01009	Diptericin	Drosophila melanogaster [Fruit fly]	Non-AVP	0	1
dbAMP_01024	Diptericin-A	Protophormia terraenovae [Northern blowfly]	Non-AVP	0.008	0.992
dbAMP_01025	Diptericin-D	Protophormia terraenovae [Northern blowfly]	AVP	0.85	0.15
dbAMP_01032	Ponericin-G4	Pachycondyla goeldii [Ponerine ant]	AVP	0.716	0.284
dbAMP_01045	Tenecin-3	Tenebrio molitor [Yellow mealworm beetle]	AVP	0.918	0.082
dbAMP_01086	Proline-rich antimicrobial peptide 1	Galleria mellonella [Greater wax moth]	Non-AVP	0.004	0.996
dbAMP_01091	Defensin-like peptide	Galleria mellonella [Greater wax moth]	Non-AVP	0.272	0.728
dbAMP_01094	Heliomicin	Heliothis virescens [Tobacco budworm moth]	AVP	0.698	0.302
dbAMP_01097	Heliomicin Mutant	Heliothis virescens [Tobacco budworm moth]	AVP	1	0
dbAMP_01100	ARD1	Archaeoprepona demophoon	Non-AVP	0.146	0.854
dbAMP_01102	Defensin ARD1	Archaeoprepona demophon [One-spotted leafwing butterfly]	AVP	0.704	0.296
dbAMP_01127	Diptericin	Sarcophaga peregrina [Flesh fly]	Non-AVP	0.104	0.896
dbAMP_01138	Lebocin-3 precursor	Bombyx mori [Silk moth]	AVP	0.984	0.016
dbAMP_01139	Lebocin-1/2 precursor	Bombyx mori [Silk moth]	AVP	0.998	0.002
dbAMP_01140	Lebocin-4 precursor	Bombyx mori [Silk moth]	Non-AVP	0.298	0.702
dbAMP_01231	Galleria defensin	Galleria mellonella [Greater wax moth]	Non-AVP	0.268	0.732
dbAMP_01232	Defensin	Galleria mellonella [Greater wax moth]	Non-AVP	0.004	0.996
dbAMP_01243	Hemiptericin	Pyrrhocoris apterus [Sap sucking bug]	Non-AVP	0.306	0.694
dbAMP_01248	Pilosulin 5	Myrmecia pilosula [Jack jumper ant]	AVP	0.972	0.028
dbAMP_01256	Gloverin	Hyalophora cecropia [Cecropia moth]	Non-AVP	0.282	0.718
dbAMP_01278	Lebocin-like anionic peptide 1	Galleria mellonella [Greater wax moth]	AVP	0.98	0.02
dbAMP_01367	Hymenoptaecin	Apis mellifera [Honeybee]	Non-AVP	0.218	0.782
dbAMP_01407	Proline-rich antimicrobial peptide 2	Galleria mellonella [Greater wax moth]	Non-AVP	0.324	0.676
dbAMP_01457	Scarabaecin	Oryctes rhinoceros [Coconut rhinoceros beetle]	AVP	0.854	0.146
dbAMP_01474	Cecropin-D-like peptide	Galleria mellonella [Greater wax moth]	AVP	0.93	0.07
dbAMP_01481	Jellein-3	Apis mellifera [Honeybee]	AVP	0.544	0.456
dbAMP_01482	Jelleine-III	Apis mellifera [Honeybee]	Non-AVP	0.298	0.702
dbAMP_01485	Venom peptide 2-long	Orancistrocerus drewseni [Solitary wasp]	Non-AVP	0.412	0.588
dbAMP_01554	Anionic antimicrobial peptide 2	Galleria mellonella [Greater wax moth]	Non-AVP	0	1
dbAMP_01616	Eumenine mastoparan-ER	Eumenes rubrofemoratus [Solitary wasp]	AVP	0.74	0.26
dbAMP_01617	Pilosulin 4	Myrmecia banksi [Jack jumper ant]	AVP	0.588	0.412
dbAMP_01625	Eumenine mastoparan-EF	Eumenes fraterculus [Solitary wasp]	AVP	0.654	0.346
dbAMP_01789	Ponericin-W6	Pachycondyla goeldii [Ponerine ant]	AVP	0.986	0.014
dbAMP_01803	Andropin	Drosophila teissieri [Fruit fly]	AVP	0.964	0.036
dbAMP_01907	Dinoponeratoxin Da-1837	Dinoponera australis [Giant neotropical hunting ant]	AVP	0.744	0.256
dbAMP_01954	Vespid chemotactic peptide 5g	Vespa magnifica [Hornet]	AVP	0.962	0.038
dbAMP_02036	Vespid chemotactic peptide 5e	Vespa magnifica [Hornet]	AVP	0.854	0.146
dbAMP_02044	Temporin-1CSb&&Vespid chemotactic peptide 5h	Rana cascadae&&Vespa magnifica [Hornet]	Non-AVP	0	1
dbAMP_02060	Vespid chemotactic peptide 5f	Vespa magnifica [Hornet]	AVP	0.64	0.36
dbAMP_02105	Crabrolin	Vespa crabro [European hornet]	AVP	1	0
dbAMP_02252	VESP-VB1	Vespa bicolor	Non-AVP	0.104	0.896
dbAMP_02288	Putative defense protein 1	Antheraea mylitta [Tasar silkworm]	AVP	0.63	0.37
dbAMP_02289	Putative defense protein 1	Lonomia obliqua [Moth]	Non-AVP	0.268	0.732
dbAMP_02336	Defensin	Formica aquilonia [Red wood ant]	AVP	0.678	0.322
dbAMP_02337	Defensin, isoforms B	Zophobas atratus [Giant mealworm beetle]	AVP	0.774	0.226
dbAMP_02338	Defensin C	Zophobas atratus [Giant mealworm beetle]	AVP	0.892	0.108
dbAMP_02339	Defensin 1 precursor	Acalolepta luxuriosa [Udo longhorn beetle]	AVP	0.742	0.258
dbAMP_02372	Cecropin D (Fragment)	Spodoptera litura [Asian cotton leafworm]	AVP	0.984	0.016
dbAMP_02388	Abaecin	Bombus pascuorum [Common carder bumblebee]	Non-AVP	0.106	0.894
dbAMP_02389	European bumblebee abaecin	Bombus pascuorum [Common carder bumblebee]	AVP	0.542	0.458
dbAMP_02397	Ponericin-W5	Pachycondyla goeldii [Ponerine ant]	AVP	0.92	0.08
dbAMP_02409	PP13	Pteromalus puparum	AVP	0.998	0.002
dbAMP_02556	Defensin	Aeshna cyanea [Southern hawker dragonfly]	AVP	0.698	0.302
dbAMP_02557	Longicin	Haemaphysalis longicornis [Bush tick]	AVP	0.924	0.076
dbAMP_02578	Macropin 1	Macropis fulvipes	AVP	0.892	0.108
dbAMP_02599	Defensin D	Aedes albopictus [Asian tiger mosquito]	AVP	0.982	0.018
dbAMP_02600	Defensin	Aedes albopictus [Asian tiger mosquito]	AVP	0.98	0.02
dbAMP_02652	Osmin	Osmia rufa [Red mason bee]	AVP	0.818	0.182
dbAMP_02655	Melectin	Melecta albifrons [Cuckoo bee]	AVP	1	0
dbAMP_02733	Cecropin-A2	Aedes albopictus [Asian tiger mosquito]	AVP	0.966	0.034
dbAMP_02734	Cecropin-A	Culex pipiens pipiens [Northern house mosquito]	Non-AVP	0.332	0.668
dbAMP_02736	Cecropin-A	Aedes aegypti [Yellowfever mosquito]	AVP	0.966	0.034
dbAMP_02737	Cecropin-C type 1, Cecropin-C type 2	Aedes albopictus [Asian tiger mosquito]	Non-AVP	0.282	0.718
dbAMP_02738	AalCecC	Aedes albopictus [Asian tiger mosquito]	AVP	1	0
dbAMP_02739	Cecropin-A1 , Cecropin-A	Aedes albopictus [Asian tiger mosquito]	Non-AVP	0.036	0.964
dbAMP_02740	Cecropin A1	Aedes albopictus [Asian tiger mosquito]	Non-AVP	0.036	0.964
dbAMP_02741	Antibiotic peptide cecropin B1, Antibiotic peptide cecropin B2	Aedes albopictus [Asian tiger mosquito]	Non-AVP	0.272	0.728
dbAMP_02742	AalCecB	Aedes albopictus [Asian tiger mosquito]	Non-AVP	0.298	0.702
dbAMP_02883	Melittin	Apis florea [Little honeybee]	AVP	0.726	0.274
dbAMP_02884	Melittin	Apis dorsata [Giant honeybee]	AVP	0.906	0.094
dbAMP_02893	Melittin	Polistes hebraeus [Paper wasp]	AVP	0.822	0.178
dbAMP_02895	Melittin	Vespa magnifica [Hornet]&&Apis mellifera [Honeybee]&&Vespula maculifrons [Eastern yellow jacket]&&Vespa velutina nigrithorax [Hornet]	AVP	1	0
dbAMP_02896	Melittin, minor	Apis mellifera [Honey bee]	AVP	1	0
dbAMP_03186	Ponericin-W4	Pachycondyla goeldii [Ponerine ant]	AVP	0.92	0.08
dbAMP_03187	Ponericin-W3	Pachycondyla goeldii [Ponerine ant]	AVP	1	0
dbAMP_03208	VIRE_HELVI Virescein	Heliothis virescens [Tobacco budworm moth]	AVP	0.962	0.038
dbAMP_03210	Moricin	Spodoptera exigua [Beet armyworm]	Non-AVP	0.036	0.964
dbAMP_03211	Moricin-like peptide B	Galleria mellonella [Greater wax moth]	AVP	0.774	0.226
dbAMP_03212	Manduca Sexta Moricin	Manduca sexta [Tobacco hawkmoth]	AVP	0.742	0.258
dbAMP_03228	Drosocin	Drosophila simulans [Fruit fly]&&Drosophila melanogaster [Fruit fly]	AVP	0.86	0.14
dbAMP_03242	PP113	Pteromalus puparum	AVP	1	0
dbAMP_03243	Halictine 2	Halictus sexcinctus	AVP	0.964	0.036
dbAMP_03451	Pilosulin-1	Myrmecia pilosula [Jack jumper ant]	AVP	0.64	0.36
dbAMP_03452	Pilosulin 1	Myrmecia pilosula [Jack jumper ant]	Non-AVP	0.044	0.956
dbAMP_03475	Ponericin-G5	Pachycondyla goeldii [Ponerine ant]	AVP	0.98	0.02
dbAMP_03476	Dinoponeratoxin Da-3105	Dinoponera australis [Giant neotropical hunting ant]	AVP	0.972	0.028
dbAMP_03477	Dinoponeratoxin Da-3177	Dinoponera australis [Giant neotropical hunting ant]	Non-AVP	0.298	0.702
dbAMP_03478	Dinoponeratoxin Dq-3104	Dinoponera quadriceps [South American ant]	Non-AVP	0.146	0.854
dbAMP_03479	Dinoponeratoxin Dq-3162/Dq-3163/Dq-3178	Dinoponera quadriceps [South American ant]	AVP	1	0
dbAMP_03566	Anoplin	Anoplius samariensis [Solitary wasp]	AVP	1	0
dbAMP_03573	Cryptonin	Cryptotympana dubia [Korean horse cicada]	AVP	0.528	0.472
dbAMP_03640	Pilosulin-2	Myrmecia pilosula [Jack jumper ant]	AVP	0.762	0.238
dbAMP_03712	Lasiocepsin	Lasioglossum laticeps	AVP	0.966	0.034
dbAMP_03774	Ponericin-G6	Pachycondyla goeldii [Ponerine ant]	Non-AVP	0.104	0.896
dbAMP_03775	Ponericin-G7	Pachycondyla goeldii [Ponerine ant]	Non-AVP	0.44	0.56
dbAMP_03891	Halictine 1	Halictus sexcinctus	AVP	0.92	0.08
dbAMP_03896	CECD_BOMMO Cecropin-D precursor	Bombyx mori [Silk moth]	AVP	0.892	0.108
dbAMP_03904	Apidaecin-2	Apis mellifera [Honeybee]	AVP	0.508	0.492
dbAMP_03905	Apidaecin-1A	Apis mellifera [Honeybee]	Non-AVP	0.474	0.526
dbAMP_03906	Apidaecin-1B	Apis mellifera [Honeybee]	Non-AVP	0.282	0.718
dbAMP_03909	Apidaecin	Bombus pascuorum [Brown bumblebee]	Non-AVP	0	1
dbAMP_03988	Eumenine mastoparan-OD	Orancistrocerus drewseni [Solitary wasp]	AVP	0.984	0.016
dbAMP_04003	Cecropin-A precursor	Anopheles gambiae [African malaria mosquito]	AVP	0.774	0.226
dbAMP_04004	Cecropin-B1	Culex pipiens pipiens [Northern house mosquito]	AVP	0.586	0.414
dbAMP_04007	Formaecin-1	Myrmecia gulosa [Red bulldog ant]	AVP	0.672	0.328
dbAMP_04008	Formaecin-2	Myrmecia gulosa [Red bulldog ant]	Non-AVP	0	1
dbAMP_04034	Cecropin-B2	Culex pipiens pipiens [Northern house mosquito]	AVP	0.752	0.248
dbAMP_04051	PP102	Pteromalus puparum	AVP	0.508	0.492
dbAMP_04078	Thanatin	Podisus maculiventris [Spined soldier bug]	AVP	0.982	0.018
dbAMP_04092	Md-Cec	Musca domestica (house fly ) [House fly]	AVP	0.668	0.332
dbAMP_04094	PREDICTED: hymenoptaecin-like, partial [Bombus impatiens].	Bombus impatiens [Common eastern bumble bee]	Non-AVP	0.002	0.998
dbAMP_04120	Phormicin	Protophormia terraenovae [Northern blowfly]	Non-AVP	0.27	0.73
dbAMP_04121	Macropin 2	Macropis fulvipes	AVP	0.936	0.064
dbAMP_04182	Antibacterial peptide	Harmonia axyridis [Multicolored Asian lady beetle]	AVP	0.716	0.284
dbAMP_04291	Alloferon 2	Calliphora vicina [Blow fly]	Non-AVP	0.17	0.83
dbAMP_04294	Gallerimycin	Galleria mellonella [Greater wax moth]	AVP	0.996	0.004
dbAMP_04301	Dinoponeratoxin Da-1039	Dinoponera australis [Giant neotropical hunting ant]	Non-AVP	0	1
dbAMP_04349	Sarcotoxin-1D	Sarcophaga peregrina [Flesh fly]	Non-AVP	0.398	0.602
dbAMP_04352	Ponericin-G1	Pachycondyla goeldii [Ponerine ant]	Non-AVP	0.332	0.668
dbAMP_04353	Ponericin-G2	Pachycondyla goeldii [Ponerine ant]	AVP	0.964	0.036
dbAMP_04354	Ponericin-G3	Pachycondyla goeldii [Ponerine ant]	AVP	0.762	0.238
dbAMP_04355	Hinnavin I	Artogeia rapae [Small white butterfly]	AVP	0.752	0.248
dbAMP_04366	DmCecA	Aedes albopictus [Asian tiger mosquito]	AVP	0.586	0.414
dbAMP_04367	CEC1_DROVI Cecropin-1 precursor	Drosophila virilis [Fruit fly]	AVP	0.954	0.046
dbAMP_04369	Sarcotoxin-1A&&CEC2_DROVI Cecropin-2 precursor	Sarcophaga peregrina [Flesh fly]&&Drosophila virilis [Fruit fly]	AVP	0.726	0.274
dbAMP_04370	Cecropin-A1/A2	Drosophila melanogaster [Fruit fly]	AVP	0.892	0.108
dbAMP_04371	CECA1_DROSE Cecropin-A1 precursor&&Cecropin-A1	Drosophila sechellia [Fruit fly]&&Drosophila mauritiana [Fruit fly]	AVP	1	0
dbAMP_04372	Cecropin-1	Ceratitis capitata [Mediterranean fruit fly]	AVP	0.544	0.456
dbAMP_04373	Cecropin-2	Ceratitis capitata [Mediterranean fruit fly]	AVP	0.906	0.094
dbAMP_04375	Sarcotoxin-1B	Sarcophaga peregrina [Flesh fly]	AVP	0.752	0.248
dbAMP_04377	Sarcotoxin Pd	Paederus dermatitis	AVP	1	0
dbAMP_04378	Cecropin	Glossina morsitans morsitans [Savannah tsetse fly]	Non-AVP	0.27	0.73
dbAMP_04379	Cecropin-C&&CECC_DROSI Cecropin-C precursor&&CECC_DROTE Cecropin-C precursor&&CECC_DROTK Cecropin-C precursor&&CECC_DROOR Cecropin-C precursor	Drosophila mauritiana [Fruit fly]&&Drosophila simulans [Fruit fly]&&Drosophila teissieri [Fruit fly]&&Drosophila takahashii [Fruit fly]&&Drosophila orena [Fruit fly]&&Drosophila erecta [Fruit fly]&&Drosophila sechellia [Fruit fly]&&Drosophila yakuba [Fruit fly]	AVP	0.998	0.002
dbAMP_04380	Cecropin-C	Drosophila melanogaster [Fruit fly]	Non-AVP	0.332	0.668
dbAMP_04387	Sarcotoxin-1C	Sarcophaga peregrina [Flesh fly]	AVP	0.64	0.36
dbAMP_04389	Cecropin-B	Drosophila melanogaster [Fruit fly]	AVP	0.906	0.094
dbAMP_04422	Probable antibacterial peptide	Riptortus clavatus [Bean bug]	AVP	0.81	0.19
dbAMP_04465	Putative defense protein	Locusta migratoria [Migratory locust]	Non-AVP	0.398	0.602
dbAMP_04472	Alloferon-1	Calliphora vicina [Blue blowfly]	AVP	0.788	0.212
dbAMP_04508	Metchnikowin	Drosophila melanogaster [Fruit fly]	Non-AVP	0.004	0.996
dbAMP_04515	Defensin	Bombus ignitus [Bumblebee]	Non-AVP	0	1
dbAMP_04560	Mastoparan-1	Polybia paulista [Neotropical social wasp]	AVP	0.744	0.256
dbAMP_04561	Pilosulin 2	Myrmecia pilosula [Jack jumper ant]	AVP	0.586	0.414
dbAMP_04562	Polybia-MP-II	Polybia paulista [Neotropical social wasp]	AVP	0.588	0.412
dbAMP_04563	Polybia-MP-III	Polybia paulista [Neotropical social wasp]	Non-AVP	0.146	0.854
dbAMP_04591	Andropin	Drosophila yakuba [Fruit fly]	AVP	0.992	0.008
dbAMP_04597	HaA4	Harmonia axyridis [Multicolored Asian lady beetle]	AVP	0.744	0.256
dbAMP_04636	Pilosulin 3	Myrmecia banksi [Jack jumper ant]	AVP	0.588	0.412
dbAMP_04655	Bombolitin III	Megabombus pennsylvanicus [American common bumblebee]	AVP	0.704	0.296
dbAMP_04660	Bombolitin I	Megabombus pennsylvanicus [American common bumblebee]	AVP	0.928	0.072
dbAMP_04672	Mastoparan-A	Vespa analis [Yellow-vented hornet]	Non-AVP	0.11	0.89
dbAMP_04696	OdVP2	Orancistrocerus drewseni [Solitary wasp]	Non-AVP	0.344	0.656
dbAMP_04734	0	Agelaia pallipes [Neotropical social wasp]&&Protonectarina sylveirae [Brazilian wasp]	Non-AVP	0.268	0.732
dbAMP_04735	Polybia-CP	Polybia paulista [Neotropical social wasp]	Non-AVP	0.01	0.99
dbAMP_04783	Bombolitin IV	Megabombus pennsylvanicus [American common bumblebee]	AVP	0.694	0.306
dbAMP_04784	Mastoparan-T	Vespa tropica [Greater banded hornet]	AVP	0.962	0.038
dbAMP_04785	Mastoparan M	Vespa mandarinia [Asian giant hornet]	Non-AVP	0.012	0.988
dbAMP_04786	Mastoparan-like peptide 12c precursor	Vespa magnifica [Hornet]	Non-AVP	0.27	0.73
dbAMP_04789	Mastoparan-like peptide 12d	Vespa magnifica [Hornet]	AVP	0.846	0.154
dbAMP_04796	Mastoparan analogue 9, 11, 12&&Mastoparan	Synthetic construct&&Vespula lewisii [Korean yellow-jacket wasp]	Non-AVP	0.012	0.988
dbAMP_04798	Eumenine mastoparan-AF	Anterhynchium flavomarginatum micado [Solitary wasp]	AVP	0.936	0.064
dbAMP_04799	MP-VB1	Vespa bicolor	AVP	0.698	0.302
dbAMP_04801	Psychimicin	Oiketicus kirbyi [Bagworm moth]	Non-AVP	0.072	0.928
dbAMP_04808	Bombolitin V	Megabombus pennsylvanicus [American common bumblebee]	Non-AVP	0.146	0.854
dbAMP_04810	MASTP_PROSY Mastoparan	Protonectarina sylveirae [Brazilian wasp]	AVP	0.972	0.028
dbAMP_04811	Mastoparan-like peptide 12a	Vespa magnifica [Hornet]	Non-AVP	0.044	0.956
dbAMP_04812	Mastoparan-like peptide 12b	Vespa magnifica [Hornet]	AVP	0.946	0.054
dbAMP_04813	Dominulin-B	Polistes dominulus [European paper wasp]	AVP	0.906	0.094
dbAMP_04814	Dominulin-A	Polistes dominulus [European paper wasp]	AVP	0.822	0.178
dbAMP_04815	Pm_mastoparan PMM	Polistes dorsalis [Paper wasp]	AVP	1	0
dbAMP_04816	Pd_mastoparan PDD-A	Polistes dorsalis [Paper wasp]	AVP	0.998	0.002
dbAMP_04817	Mastoparan-V1	Vespula vulgaris [Yellow jacket]	AVP	0.64	0.36
dbAMP_04818	Mastoparan-V2	Vespula vulgaris [Yellow jacket]	AVP	0.668	0.332
dbAMP_04822	Agelaia-mastoparan	Agelaia pallipes [Neotropical social wasp]	Non-AVP	0.268	0.732
dbAMP_04823	Pd_mastoparan PDD-B	Polistes dorsalis [Paper wasp]	AVP	0.988	0.012
dbAMP_04824	Mp_mastoparan MP	Polistes dorsalis [Paper wasp]	AVP	0.97	0.03
dbAMP_04868	Nahymenoptaecin-2 precursor	Nasonia vitripennis [Parasitic wasp]	AVP	0.736	0.264
dbAMP_04980	OdVP3	Orancistrocerus drewseni [Solitary wasp]	Non-AVP	0.176	0.824
dbAMP_05020	DVC-AP3-2 (Fragment)	Manduca sexta [Tobacco hawkmoth]	AVP	1	0
dbAMP_05031	Moricin-like peptide D	Galleria mellonella [Greater wax moth]	AVP	1	0
dbAMP_05089	Bicarinalin	Tetramorium bicarinatum	AVP	0.968	0.032
dbAMP_05101	Antimicrobial peptide moricin	Danaus plexippus [Monarch butterfly]	AVP	0.506	0.494
dbAMP_05150	Spingerin C-4	Pseudacanthotermes spiniger	AVP	0.892	0.108
dbAMP_05189	Hymenoptaecin-1 isoform 1 precursor	Nasonia vitripennis [Parasitic wasp]	Non-AVP	0.022	0.978
dbAMP_05217	Px-cec1	Plutella xylostella L [Diamondback moth]	Non-AVP	0.27	0.73
dbAMP_05218	PxCECA1	Plutella xylostella [Diamondback moth]	AVP	0.998	0.002
dbAMP_05267	Antibacterial protein	Antheraea mylitta [Tasar silkworm]	AVP	0.994	0.006
dbAMP_05388	Lysozyme c-1	Anopheles gambiae [African malaria mosquito]	Non-AVP	0.406	0.594
dbAMP_05391	Lysozyme	Bombyx mori [Silk moth]	AVP	0.678	0.322
dbAMP_05446	G. mellonella moricin-like peptide A	Galleria mellonella [Greater wax moth]	AVP	0.63	0.37
dbAMP_05447	Moricin-like peptide A	Galleria mellonella [Greater wax moth]	Non-AVP	0.142	0.858
dbAMP_05448	Moricin-like peptide C1	Galleria mellonella [Greater wax moth]	AVP	0.962	0.038
dbAMP_05449	Moricin-like peptide C3	Galleria mellonella [Greater wax moth]	AVP	0.964	0.036
dbAMP_05450	Moricin-like peptide C2	Galleria mellonella [Greater wax moth]	AVP	0.97	0.03
dbAMP_05451	Moricin-like peptide C4, Moricin-like peptide C5	Galleria mellonella [Greater wax moth]	AVP	0.98	0.02
dbAMP_05476	Lysozyme C-1	Anas platyrhynchos [Domestic duck]	Non-AVP	0.398	0.602
dbAMP_05486	Hinnavin II	Artogeia rapae [Small white butterfly]	AVP	0.962	0.038
dbAMP_05488	Cecropin-B	Antheraea pernyi [Chinese oak silk moth]	AVP	1	0
dbAMP_05494	Cecropin-A	Hyalophora cecropia [Cecropia moth]	AVP	0.996	0.004
dbAMP_05533	Cecropin B	Hyalophora cecropia [Cecropia moth]	AVP	0.998	0.002
dbAMP_05534	Cecropin-B	Hyalophora cecropia [Cecropia moth]	AVP	1	0
dbAMP_05535	Cecropin-B	Heliothis virescens [Tobacco budworm moth]	AVP	0.972	0.028
dbAMP_05645	Panurgine K	Panurgus calcaratus	AVP	0.726	0.274
dbAMP_05646	Panurgine R	Panurgus calcaratus	AVP	0.972	0.028
dbAMP_05709	Cecropin (Fragment)	Hyalophora cecropia [Cecropia moth]	AVP	0.954	0.046
dbAMP_05745	Lucilin, partial	Lucilia sericata [Green bottle fly]	AVP	0.918	0.082
dbAMP_05796	Bombolitin-7	Bombus lapidarius [Red-tailed bumblebee]	AVP	0.752	0.248
dbAMP_05797	Bombolitin-8	Bombus lapidarius [Red-tailed bumblebee]	Non-AVP	0.498	0.502
dbAMP_05798	Mastoparan B	Vespa basalis [Hornet]	AVP	0.994	0.006
dbAMP_05855	Ponericin-L2	Pachycondyla goeldii [Ponerine ant]	AVP	1	0
dbAMP_05856	Ponericin-L1	Pachycondyla goeldii [Ponerine ant]	Non-AVP	0.364	0.636
dbAMP_05894	Eumenitin	Eumenes rubronotatus [Solitary wasp]	Non-AVP	0	1
dbAMP_05895	Eumenitin-F	Eumenes rubrofemoratus [Solitary wasp]	Non-AVP	0.122	0.878
dbAMP_05896	Eumenitin-R	Eumenes rubrofemoratus [Solitary wasp]	Non-AVP	0	1
dbAMP_05897	Bombolitin-6	Bombus lapidarius [Red-tailed bumblebee]	Non-AVP	0.27	0.73
dbAMP_05899	Panurgine 1	Panurgus calcaratus	AVP	0.98	0.02
dbAMP_06007	Mastoparan-S	Sphodromantis viridis [Giant African praying mantis)]	AVP	1	0
dbAMP_06059	Sapecin-B	Sarcophaga peregrina [Flesh fly]	AVP	0.854	0.146
dbAMP_06067	Defense protein 6	Lonomia obliqua [Moth]	Non-AVP	0.406	0.594
dbAMP_06220	PREDICTED: abaecin isoform X1 [Apis mellifera].	Apis mellifera [Honey bee]	AVP	0.922	0.078
dbAMP_06239	PR-5-like protein	Toxoptera citricida [Brown citrus aphid]	Non-AVP	0.104	0.896
dbAMP_06283	Coleoptericin 2	Sitophilus zeamais [Maize weevil]	Non-AVP	0.398	0.602
dbAMP_06315	Transferrin	Bombyx mori [Silk moth]	AVP	0.704	0.296
dbAMP_06316	Transferrin	Ephestia kuehniella [Mediterranean flour moth]	Non-AVP	0.022	0.978
dbAMP_06414	AAEL011641-PA	Aedes aegypti [Yellowfever mosquito]	Non-AVP	0.298	0.702
dbAMP_06417	Transferrin	Drosophila silvestris [Fruit fly]	AVP	0.774	0.226
dbAMP_06488	LD22449p (Transferrin 2)	Drosophila melanogaster [Fruit fly]	AVP	1	0
dbAMP_06569	Thaumatin-like protein 2	Coptotermes formosanus [Formosan subterranean termite]	Non-AVP	0.406	0.594
dbAMP_06570	Thaumatin-like protein 1	Coptotermes formosanus [Formosan subterranean termite]	AVP	0.906	0.094
dbAMP_06571	Thaumatin-like protein 3	Coptotermes formosanus [Formosan subterranean termite]	Non-AVP	0.006	0.994
dbAMP_06592	ACYPI009605 protein	Acyrthosiphon pisum [Pea aphid]	Non-AVP	0.294	0.706
dbAMP_06593	PREDICTED: thaumatin-like protein	Acyrthosiphon pisum [Pea aphid]	AVP	0.998	0.002
dbAMP_06594	PREDICTED: thaumatin-like protein 1b	Acyrthosiphon pisum [Pea aphid]	AVP	0.998	0.002
dbAMP_06596	Cecropin-A	Danaus plexippus [Monarch butterfly]	AVP	1	0
dbAMP_06695	PR-5-like protein	Lysiphlebus testaceipes [Greenbugs aphid parastoid]	Non-AVP	0.324	0.676
dbAMP_06923	Putative prolixin antimicrobial peptide	Rhodnius prolixus	Non-AVP	0.336	0.664
dbAMP_07386	Like moricin	Manduca sexta [Tobacco hawkmoth]	Non-AVP	0.39	0.61
dbAMP_07489	Lactotransferrin	Culex quinquefasciatus [Southern house mosquito]	Non-AVP	0.04	0.96
dbAMP_07526	PREDICTED: abaecin-like [Apis dorsata].	Apis dorsata [Giant honeybee]	AVP	1	0
dbAMP_07553	Drosomycin-like A	Drosophila triauraria	Non-AVP	0.184	0.816
dbAMP_07554	Lactotransferrin	Danaus plexippus [Monarch butterfly]	Non-AVP	0.4	0.6
dbAMP_07565	Transferrin	Plutella xylostella [Diamondback moth]	AVP	0.98	0.02
dbAMP_07774	Abaesin	Bombus ignitus [Bumblebee]	AVP	1	0
dbAMP_07775	Nasonin-1	Nasonia vitripennis [Parasitic wasp]	AVP	0.984	0.016
dbAMP_07810	Cecropin F2	Spodoptera exigua [beet armyworm ]	AVP	0.762	0.238
dbAMP_07817	Cecropin-D	Danaus plexippus [Monarch butterfly]	AVP	0.528	0.472
dbAMP_07830	Defensin	Apis cerana japonica	AVP	0.992	0.008
dbAMP_07831	Defensin	Apis cerana japonica	AVP	0.968	0.032
dbAMP_07832	Defensin	Apis cerana japonica	AVP	0.972	0.028
dbAMP_07833	Defensin	Apis cerana japonica	AVP	1	0
dbAMP_07835	Defensin	Apis cerana japonica	AVP	0.954	0.046
dbAMP_07836	Hyphancin-3E	Danaus plexippus [Monarch butterfly]	AVP	0.964	0.036
dbAMP_07837	Abaecin	Manica rubida	AVP	0.988	0.012
dbAMP_07838	Abaecin	Acromyrmex echinatior [Panamanian leafcutter ant]	AVP	0.992	0.008
dbAMP_07839	PREDICTED: hymenoptaecin-like [Megachile rotundata].	Megachile rotundata [Alfalfa leafcutting bee]	Non-AVP	0.106	0.894
dbAMP_07840	Hymenoptaecin	Bombus ignitus [Bumblebee]	Non-AVP	0.292	0.708
dbAMP_07841	Hymenoptaecin	Bombus ignitus [Bumblebee]	AVP	0.524	0.476
dbAMP_07842	Hymenoptaecin (Fragment)	Apis andreniformis	Non-AVP	0.106	0.894
dbAMP_07843	PREDICTED: hymenoptaecin-like [Apis florea].	Apis florea [Little honeybee]	AVP	0.63	0.37
dbAMP_07844	Hymenoptaecin (Fragment)	Apis dorsata [Giant honeybee]	AVP	0.542	0.458
dbAMP_07845	Hymenoptaecin (Fragment)	Apis mellifera [Honeybee]	Non-AVP	0.282	0.718
dbAMP_07847	Hymenoptaecin (Fragment)	Apis koschevnikovi [Koschevnikov's honey bee]	Non-AVP	0.036	0.964
dbAMP_07864	Antimicrobial peptide defensin 1-2	Nasonia vitripennis [Parasitic wasp]	Non-AVP	0.354	0.646
dbAMP_07868	PREDICTED: melittin-like	Apis florea [Little honeybee]	AVP	0.98	0.02
dbAMP_07879	Cecropin F1	Spodoptera exigua [beet armyworm ]	AVP	0.996	0.004
dbAMP_07882	CEC-A	Anopheles merus [Mosquito]	AVP	0.93	0.07
dbAMP_07883	Cecropin A1	Spodoptera exigua [beet armyworm ]	AVP	1	0
dbAMP_07884	Cecropin D	Spodoptera exigua [beet armyworm ]	AVP	1	0
dbAMP_07885	Cecropin B	Spodoptera exigua [beet armyworm ]	Non-AVP	0.498	0.502
dbAMP_07886	Antimicrobial peptide cecropin 6	Manduca sexta [Tobacco hawkmoth]	AVP	1	0
dbAMP_07891	Moricin-like peptide A	Galleria mellonella [Greater wax moth]	AVP	1	0
dbAMP_07894	Virescein	Heliothis virescens [Tobacco budworm moth]	AVP	0.558	0.442
dbAMP_07895	Moricin	Helicoverpa armigera [Cotton bollworm]	AVP	0.974	0.026
dbAMP_07896	Cecropin	Acalolepta luxuriosa [Udo longhorn beetle]	AVP	1	0
dbAMP_07898	Abaecin	Myrmica rubra&&Myrmica ruginodis [Red ant]&&Myrmica sulcinodis&&Myrmica fracticornis	AVP	0.752	0.248
dbAMP_07899	Abaecin	Myrmica alaskensis&&Myrmica scabrinodis&&Myrmica brevispinosa&&Myrmica lobicornis&&Myrmica sabuleti&&Myrmica rugulosa	AVP	0.992	0.008
dbAMP_07917	Antifungal peptide gallerimycin	Galleria mellonella [Greater wax moth]	AVP	1	0
dbAMP_07994	Moricin-like peptide C4	Danaus plexippus [Monarch butterfly]	AVP	0.752	0.248
dbAMP_08014	Hymenoptaecin	Harpegnathos saltator [Jerdon's jumping ant]	AVP	0.64	0.36
dbAMP_08038	Transferrin	Apriona germari [Mulberry longhorn beetle]	AVP	0.854	0.146
dbAMP_08065	Antimicrobial peptide defensin 1-1	Nasonia vitripennis [Parasitic wasp]	AVP	0.964	0.036
dbAMP_08078	Hymenoptaecin	Solenopsis invicta [Red imported fire ant]	Non-AVP	0.176	0.824
dbAMP_08079	Defensin prepropeptide	Camponotus floridanus [Florida carpenter ant]	AVP	0.854	0.146
dbAMP_08081	Hymenoptaecin	Harpegnathos saltator [Jerdon's jumping ant]	AVP	0.64	0.36
dbAMP_08092	Hymenoptaecin-1 isoform 2 precursor [Nasonia vitripennis].	Nasonia vitripennis [Jewel wasp]	Non-AVP	0.068	0.932
dbAMP_08093	Antibacterial peptide cecropin 1	Plutella xylostella [Diamondback moth]	AVP	1	0
dbAMP_08094	Antimicrobial peptide cecropin	Plutella xylostella [Diamondback moth]	AVP	0.992	0.008
dbAMP_08095	Cecropin 2	Plutella xylostella [Diamondback moth]	Non-AVP	0.354	0.646
dbAMP_08362	Gambicin	Anopheles albimanus [New world malaria mosquito]	Non-AVP	0.104	0.896
dbAMP_08365	Moricin B3	Bombyx mori [Silk moth]&&Bombyx mandarina [Wild silk moth]	AVP	1	0
dbAMP_08368	Moricin B3	Bombyx mandarina [Wild silk moth]	AVP	0.974	0.026
dbAMP_08369	Moricin B3	Bombyx mandarina [Wild silk moth]	Non-AVP	0.498	0.502
dbAMP_08407	Defensin	Mamestra brassicae [Cabbage moth]	Non-AVP	0.104	0.896
dbAMP_08410	Transferrin	Solenopsis invicta [Red imported fire ant]	AVP	0.962	0.038
dbAMP_08417	Proline-rich protein	Galleria mellonella [Greater wax moth]	AVP	0.982	0.018
dbAMP_08473	Holotricin 2 precursor	Holotrichia diomphalia	Non-AVP	0.43	0.57
dbAMP_08474	Coleoptericin	Copris tripartitus	AVP	0.524	0.476
dbAMP_08475	Coleoptericin A	Trypoxylus dichotomus [Japanese rhinoceros beetle]	Non-AVP	0	1
dbAMP_08477	Coleoptericin C	Trypoxylus dichotomus [Japanese rhinoceros beetle]	Non-AVP	0.004	0.996
dbAMP_08478	Coleoptericin B	Trypoxylus dichotomus [Japanese rhinoceros beetle]	AVP	0.994	0.006
dbAMP_08502	Transferrin	Drosophila melanogaster [Fruit fly]	Non-AVP	0.11	0.89
dbAMP_08519	Cecropin B	Bombyx mori [Silk moth]	AVP	1	0
dbAMP_08520	Cecropin CBM2	Bombyx mori [Silk moth]	AVP	0.536	0.464
dbAMP_08521	Cecropin CBM2-2	Bombyx mori [Silk moth]	AVP	0.554	0.446
dbAMP_08522	Cecropin 2	Helicoverpa armigera [Cotton bollworm]	AVP	0.964	0.036
dbAMP_08524	Cecropin-A	Danaus plexippus [Monarch butterfly]	AVP	0.98	0.02
dbAMP_08525	Cecropin	Papilio xuthus [Asian swallowtail butterfly]	AVP	0.996	0.004
dbAMP_08526	Cecropin	Papilio xuthus [Asian swallowtail butterfly]	AVP	0.972	0.028
dbAMP_08529	Cecropin A	Pseudoplusia includens [Soybean looper]	AVP	0.964	0.036
dbAMP_08531	CEC2 protein	Anopheles arabiensis [Mosquito]	AVP	0.772	0.228
dbAMP_08532	AAEL000775-PA	Aedes aegypti [Yellowfever mosquito]	Non-AVP	0.354	0.646
dbAMP_08718	MIP29670p1	Drosophila melanogaster [Fruit fly]	AVP	1	0
dbAMP_08719	Cecropin B	Drosophila melanogaster [Fruit fly]	AVP	1	0
dbAMP_08720	Cecropin	Culex quinquefasciatus [Southern house mosquito]&&Culex pipiens pipiens [Northern house mosquito]	AVP	0.95	0.05
dbAMP_08721	AAEL000625-PA	Aedes aegypti [Yellowfever mosquito]	AVP	0.772	0.228
dbAMP_08722	AAEL004223-PA	Aedes aegypti [Yellowfever mosquito]	AVP	0.962	0.038
dbAMP_08724	Cecropin (Fragment)	Musca domestica [House fly]	AVP	0.982	0.018
dbAMP_08725	Cecropin A	Culex quinquefasciatus [Southern house mosquito]	AVP	1	0
dbAMP_08726	Sarcotoxin-G	Musca domestica [House fly]	AVP	0.54	0.46
dbAMP_08727	Cecropin	Bactrocera dorsalis [oriental fruit fly ]	AVP	0.54	0.46
dbAMP_08729	Cecropin	Musca domestica [House fly]	AVP	1	0
dbAMP_08730	AAEL000621-PA	Aedes aegypti [Yellowfever mosquito]	AVP	0.77	0.23
dbAMP_08732	CEC-A	Anopheles melas	AVP	0.98	0.02
dbAMP_08733	CEC-A	Anopheles melas	AVP	0.972	0.028
dbAMP_08734	CEC-A	Anopheles merus [Mosquito]	AVP	0.98	0.02
dbAMP_08735	CEC-A	Anopheles arabiensis [Mosquito]&&Anopheles quadriannulatus [Mosquito]&&Anopheles melas	AVP	0.972	0.028
dbAMP_08736	CEC-A	Anopheles arabiensis [Mosquito]	AVP	0.968	0.032
dbAMP_08737	CEC-A	Anopheles bwambae&&Anopheles melas&&Anopheles merus [Mosquito]	AVP	0.93	0.07
dbAMP_08738	CEC-A	Anopheles quadriannulatus [Mosquito]	AVP	0.968	0.032
dbAMP_08739	CEC-A	Anopheles arabiensis [Mosquito]	AVP	0.968	0.032
dbAMP_08741	AAEL000611-PA	Aedes aegypti [Yellowfever mosquito]	AVP	0.752	0.248
dbAMP_08742	Cecropin E	Bombyx mori [Silk moth]	AVP	0.962	0.038
dbAMP_08743	Cecropin A precursor.	Hyalophora cecropia [Cecropia moth]	Non-AVP	0.364	0.636
dbAMP_08746	Cecropin 1	Helicoverpa armigera [Cotton bollworm]	AVP	0.746	0.254
dbAMP_08748	Cecropin	Spodoptera littoralis [Egyptian cotton leafworm]	AVP	0.954	0.046
dbAMP_08749	Cecropin 3	Helicoverpa armigera [Cotton bollworm]	Non-AVP	0.39	0.61
dbAMP_08750	Cecropin	Helicoverpa armigera [Cotton bollworm]	AVP	0.988	0.012
dbAMP_08751	Cecropin B	Trichoplusia ni [Cabbage looper]	AVP	0.99	0.01
dbAMP_08752	Cecropin E	Spodoptera exigua [beet armyworm ]	AVP	1	0
dbAMP_08753	Cecropin D	Trichoplusia ni [Cabbage looper]	Non-AVP	0	1
dbAMP_08755	Cecropin-like protein	Antheraea mylitta [Tasar silkworm]	AVP	0.746	0.254
dbAMP_08756	Cecropin-like protein	Antheraea mylitta [Tasar silkworm]	AVP	0.946	0.054
dbAMP_08757	Cecropin-like protein	Antheraea pernyi [Chinese oak silk moth]	AVP	0.528	0.472
dbAMP_08758	AAEL000598-PA	Aedes aegypti [Yellowfever mosquito]	AVP	0.994	0.006
dbAMP_08759	Cecropin 3	Anopheles albimanus [New world malaria mosquito]	AVP	0.954	0.046
dbAMP_08761	AAEL015515-PA	Aedes aegypti [Yellowfever mosquito]	AVP	0.908	0.092
dbAMP_08762	Cecropin-like peptide 1 precuser	Hermetia illucens [Black soldier fly]	Non-AVP	0.27	0.73
dbAMP_08763	Enbocin3	Bombyx mori [Silk moth]	AVP	0.854	0.146
dbAMP_08764	Enbocin2	Bombyx mori [Silk moth]	Non-AVP	0.282	0.718
dbAMP_08765	PREDICTED: cecropin-like	Bombyx mori [Silk moth]	AVP	0.762	0.238
dbAMP_08766	Cecropin CBM1	Bombyx mori [Silk moth]	Non-AVP	0.17	0.83
dbAMP_08767	Cecropin A	Bombyx mori [Silk moth]	AVP	1	0
dbAMP_08768	CecIII	Drosophila pseudoobscura pseudoobscura [Fruit fly]	Non-AVP	0.378	0.622
dbAMP_08769	CecC	Drosophila erecta [Fruit fly]	AVP	0.554	0.446
dbAMP_08772	CecI (Cecropin I)	Drosophila pseudoobscura pseudoobscura [Fruit fly]	Non-AVP	0.184	0.816
dbAMP_08773	Cecropin II1	Drosophila subobscura [Fruit fly]	AVP	1	0
dbAMP_08776	CecA1	Drosophila simulans [Fruit fly]	Non-AVP	0.078	0.922
dbAMP_08777	Cecropin I	Drosophila subobscura [Fruit fly]	AVP	0.77	0.23
dbAMP_08778	Ovotransferrin	Harpegnathos saltator [Jerdon's jumping ant]	Non-AVP	0.298	0.702
dbAMP_08846	Cecropin-like protein	Antheraea mylitta [Tasar silkworm]	AVP	0.774	0.226
dbAMP_08847	Cecropin C	Spodoptera exigua [beet armyworm ]	AVP	0.906	0.094
dbAMP_08848	HacD	Helicoverpa armigera [Cotton bollworm]	AVP	1	0
dbAMP_08855	Cecropin-like protein	Antheraea pernyi [Chinese oak silk moth]	AVP	0.892	0.108
dbAMP_08882	Cecropin-A	Danaus plexippus [Monarch butterfly]	AVP	0.916	0.084
dbAMP_08883	Cecropin-A	Danaus plexippus [Monarch butterfly]	AVP	0.558	0.442
dbAMP_08884	CecII	Drosophila pseudoobscura pseudoobscura [Fruit fly]	AVP	0.536	0.464
dbAMP_08885	Cecropin II	Drosophila pseudoobscura pseudoobscura [Fruit fly]	AVP	0.972	0.028
dbAMP_08948	Mtk	Drosophila simulans [Fruit fly]	AVP	0.962	0.038
dbAMP_08949	Metchnikowin	Drosophila simulans [Fruit fly]	AVP	1	0
dbAMP_08952	TnGlv1	Trichoplusia ni [Cabbage looper]	AVP	0.544	0.456
dbAMP_08953	Transferrin 2	Aedes aegypti [Yellowfever mosquito]	AVP	0.986	0.014
dbAMP_08980	Antimicrobial peptide attacin AttA	Glossina morsitans morsitans [Savannah tsetse fly]	Non-AVP	0.12	0.88
dbAMP_08982	TnGlv2	Trichoplusia ni [Cabbage looper]	AVP	0.984	0.016
dbAMP_09019	Antibacterial peptide moricin	Plutella xylostella [diamondback moth ]	AVP	0.98	0.02
dbAMP_09068	Melittin	Polistes sp. [Golden paper wasp]	AVP	0.966	0.034
dbAMP_09179	Probable Antibacterial peptide polyprotein	Riptortus clavatus [Bean bug]	Non-AVP	0.07	0.93
dbAMP_09348	Transferrin	Periplaneta americana [American cockroach]	AVP	0.668	0.332
dbAMP_09363	Hepcidin	Pteropus alecto [Black flying fox]	AVP	0.906	0.094
dbAMP_09381	Lactotransferrin	Pteropus alecto [Black flying fox]	AVP	1	0
dbAMP_09391	AAEL011949-PB, AAEL011949-PA	Aedes aegypti [Yellowfever mosquito]	Non-AVP	0.316	0.684
dbAMP_09420	Cecropin 2 precursor	Tribolium castaneum [Red flour beetle]	AVP	0.936	0.064
dbAMP_09421	Antimicrobial peptide	Tribolium castaneum [Red flour beetle]	AVP	0.982	0.018
dbAMP_09503	Coleoptericin 1	Sitophilus zeamais [Maize weevil]	AVP	0.676	0.324
dbAMP_09552	AAEL015639-PA (Fragment)	Aedes aegypti [Yellowfever mosquito]	AVP	0.982	0.018
dbAMP_09553	Transferrin	Aedes aegypti [Yellowfever mosquito]	Non-AVP	0.272	0.728
dbAMP_09559	Navitripenicin	Nasonia vitripennis [Parasitic wasp]	Non-AVP	0.4	0.6
dbAMP_09564	Gambicin	Anopheles gambiae [African malaria mosquito]	AVP	0.542	0.458
dbAMP_09565	Gambicin	Anopheles gambiae [African malaria mosquito]	AVP	0.996	0.004
dbAMP_09627	PREDICTED: defense protein 4-like [Bombyx mori].	Bombyx mori [Domestic silkworm]	AVP	1	0
dbAMP_09628	Antibacterial peptide	Bombyx mori [Silk moth]	AVP	0.558	0.442
dbAMP_09629	Defensin	Plutella xylostella [diamondback moth ]	Non-AVP	0.01	0.99
dbAMP_09679	Cicadin	Cicada flammata	Non-AVP	0.104	0.896
dbAMP_09774	Cecropin-D	Agrius convolvuli [Morning glory sphinx moth]	AVP	1	0
dbAMP_09871	Lebocin	Pseudoplusia includens [Soybean looper]	AVP	0.696	0.304
dbAMP_09873	Pilosulin 4	Myrmecia pilosula [Jack jumper ant]	AVP	0.63	0.37
dbAMP_09875	Ckin1 precursor	Solenopsis invicta [Red imported fire ant]	Non-AVP	0.27	0.73
dbAMP_09903	Jellein-1	Apis mellifera [Honeybee]	AVP	0.998	0.002
dbAMP_09904	Jelleine-I	Apis mellifera [Honeybee]	AVP	0.668	0.332
dbAMP_09974	Abaecin-like	Bombus impatiens [Bumblebee]	AVP	0.64	0.36
dbAMP_09997	Beta-defensin 2 (Fragment)	Muscicapa striata [Spotted flycatcher]	AVP	0.77	0.23
dbAMP_10021	CECE_BOMMO Antibacterial peptide enbocin precursor	Bombyx mori [Silk moth]	AVP	0.508	0.492
dbAMP_10033	Attacin-B	Hyalophora cecropia [Cecropia moth]	Non-AVP	0.282	0.718
dbAMP_10035	Attacin	Bombyx mori [Silk moth]	Non-AVP	0.044	0.956
dbAMP_10041	Attacin-A	Trichoplusia ni [Cabbage looper]	Non-AVP	0.362	0.638
dbAMP_10075	Hymenoptaecin	Apis mellifera [Honeybee]	AVP	0.542	0.458
dbAMP_10092	Hymenoptaecin (Fragment)	Apis mellifera mellifera [German honeybee]	AVP	0.542	0.458
dbAMP_10106	Antifungal protein	Sarcophaga peregrina [Flesh fly]	AVP	0.996	0.004
dbAMP_10108	Cecropin B (Fragment)	Drosophila sechellia [Fruit fly]	Non-AVP	0.016	0.984
dbAMP_10157	SarcotoxinII-1	Sarcophaga peregrina [Flesh fly]	Non-AVP	0.016	0.984
dbAMP_10158	Sarcotoxin II-3	Sarcophaga peregrina [Flesh fly]	Non-AVP	0.316	0.684
dbAMP_10159	Sarcotoxin-2A	Sarcophaga peregrina [Flesh fly]	AVP	0.64	0.36
dbAMP_10160	Sarcotoxin II-2	Sarcophaga peregrina [Flesh fly]	Non-AVP	0.11	0.89
dbAMP_10170	Antimicrobial peptide defensin 3	Anopheles gambiae [African malaria mosquito]	Non-AVP	0.104	0.896
dbAMP_10208	Abaecin 1 precursor	Solenopsis invicta [Red imported fire ant]	Non-AVP	0.466	0.534
dbAMP_10212	Salivary cecropin (Fragment)	Anopheles stephensi [Indo-Pakistan malaria mosquito]	AVP	0.98	0.02
dbAMP_10246	HELN_HELVI Heliocin	Heliothis virescens [Tobacco budworm moth]	AVP	0.752	0.248
dbAMP_10247	LP1A	Manduca sexta [Tobacco hawkmoth]	Non-AVP	0.004	0.996
dbAMP_10255	Attacin-C	Drosophila melanogaster [Fruit fly]	Non-AVP	0.262	0.738
dbAMP_10261	Andropin	Drosophila orena [Fruit fly]	AVP	0.946	0.054
dbAMP_10262	CECA1_DROSI Cecropin-A1 precursor	Drosophila simulans [Fruit fly]	AVP	0.962	0.038
dbAMP_10265	Antimicrobial peptide attacin ATTA	Glossina morsitans morsitans [Savannah tsetse fly]	Non-AVP	0.292	0.708
dbAMP_10286	Attacin-B	Drosophila melanogaster [Fruit fly]	AVP	0.63	0.37
dbAMP_10287	Attacin-A	Drosophila melanogaster [Fruit fly]	Non-AVP	0.012	0.988
dbAMP_10409	Hymenoptaecin (Fragment)	Acromyrmex echinatior [Panamanian leafcutter ant]	Non-AVP	0.09	0.91
dbAMP_10418	Hymenoptaecin (Fragment)	Acromyrmex echinatior [Panamanian leafcutter ant]	Non-AVP	0.458	0.542
dbAMP_10419	Hymenoptaecin (Fragment)	Acromyrmex echinatior [Panamanian leafcutter ant]	Non-AVP	0.154	0.846
dbAMP_10426	Stomoxyn	Stomoxys calcitrans [Stable fly]	AVP	0.86	0.14
dbAMP_10506	Antimicrobial peptide moricin	Danaus plexippus [Monarch butterfly]	AVP	0.98	0.02
dbAMP_10550	Transferrin-2, partial	Spodoptera exigua [Beet armyworm]	Non-AVP	0.332	0.668
dbAMP_10658	Cecropin-C	Anopheles gambiae [African malaria mosquito]	AVP	0.828	0.172
dbAMP_10718	Metchnikowin-2	Drosophila melanogaster [Fruit fly]	Non-AVP	0	1
dbAMP_10780	Putative defense protein	Bombyx mori [Silk moth]	Non-AVP	0	1
dbAMP_10828	Diapausin precursor	Spodoptera exigua [Beet armyworm]	Non-AVP	0.122	0.878
dbAMP_10853	Lysozyme	Pseudoplusia includens [Soybean looper]	AVP	0.742	0.258
dbAMP_10854	Cecropin-A	Trichoplusia ni [Cabbage looper]	AVP	0.77	0.23
dbAMP_10855	Hyphancin-3E	Hyphantria cunea [Fall webworm moth]	AVP	0.788	0.212
dbAMP_10856	Cecropin B1	Bombyx mori [Silk moth]	AVP	0.95	0.05
dbAMP_10858	CEC4_BOMMO Cecropin	Bombyx mori [Silk moth]	AVP	0.772	0.228
dbAMP_10859	Papiliocin	Papilio xuthus [Asian swallowtail butterfly]	AVP	0.968	0.032
dbAMP_10861	Hyphancin-3D	Hyphantria cunea [Fall webworm moth]	AVP	0.984	0.016
dbAMP_10862	Cecropin A1, Lepidopteran C.	Bombyx mori [Silk moth]	AVP	1	0
dbAMP_10864	Cecropin-B	Spodoptera litura [Asian cotton leafworm]	AVP	0.926	0.074
dbAMP_10865	Cecropin-C	Heliothis virescens [Tobacco budworm moth]	AVP	0.984	0.016
dbAMP_10866	Hyphancin-3G	Hyphantria cunea [Fall webworm moth]	AVP	0.554	0.446
dbAMP_10867	Cecropin-A	Heliothis virescens [Tobacco budworm moth]	Non-AVP	0.378	0.622
dbAMP_10868	Hyphancin-3F	Hyphantria cunea [Fall webworm moth]	AVP	0.908	0.092
dbAMP_10869	Cecropin-A	Spodoptera litura [Asian cotton leafworm]	AVP	0.974	0.026
dbAMP_10959	Antimicrobial peptide Def1-2	Nasonia vitripennis [Parasitic wasp]	AVP	0.968	0.032
dbAMP_10960	Antimicrobial peptide Def1-1	Nasonia vitripennis [Parasitic wasp]	AVP	0.77	0.23
dbAMP_11037	Ceratotoxin-B	Ceratitis capitata [Mediterranean fruit fly]	AVP	0.994	0.006
dbAMP_11038	Ceratotoxin-A	Ceratitis capitata [Mediterranean fruit fly]	AVP	0.972	0.028
dbAMP_11039	Ceratotoxin-D	Ceratitis capitata [Mediterranean fruit fly]	Non-AVP	0.4	0.6
dbAMP_11086	Bombolitin II	Megabombus pennsylvanicus [American common bumblebee]	AVP	0.854	0.146
dbAMP_11093	Defensin	Triatoma infestans [Assassin bug]	AVP	0.772	0.228
dbAMP_11094	Defensin C	Rhodnius prolixus [Triatomid bug]	AVP	1	0
dbAMP_11096	Defensin 4	Triatoma brasiliensis [Blood-sucking bug]	AVP	0.972	0.028
dbAMP_11114	Ceratotoxin-C	Ceratitis capitata [Mediterranean fruit fly]	Non-AVP	0.008	0.992
dbAMP_11136	Decoralin	Oreumenes decoratus [Potter wasp]	AVP	0.786	0.214
dbAMP_11140	Coleoptericin	Zophobas atratus [Giant mealworm beetle]	AVP	0.752	0.248
dbAMP_11141	Haxy_Col6	Harmonia axyridis [Multicolored Asian lady beetle]	Non-AVP	0.316	0.684
dbAMP_11142	Haxy_Col1	Harmonia axyridis [Multicolored Asian lady beetle]	AVP	0.998	0.002
dbAMP_11143	Rhinocerosin	Oryctes rhinoceros [Coconut rhinoceros beetle]	AVP	0.678	0.322
dbAMP_11145	Acaloleptin-A1	Acalolepta luxuriosa [Udo longhorn beetle]	Non-AVP	0.148	0.852
dbAMP_11146	Holotricin-2	Holotrichia diomphalia [Korean black chafer]	AVP	0.536	0.464
dbAMP_11206	Prolixicin	Rhodnius prolixus [Triatomid bug]	Non-AVP	0.04	0.96
dbAMP_11215	SK84	Drosophila virilis [Fruit fly]	AVP	0.668	0.332
dbAMP_11218	Def-Bat	Anopheles gambiae [African malaria mosquito]	AVP	0.996	0.004
dbAMP_11219	Def-Bbb	Anopheles gambiae [African malaria mosquito]	AVP	1	0
dbAMP_11220	Defensin 3	Triatoma brasiliensis [Blood-sucking bug]	Non-AVP	0.044	0.956
dbAMP_11296	Defensin-2	Apis mellifera [Honeybee]	Non-AVP	0.43	0.57
dbAMP_11299	Luxuriosin	Acalolepta luxuriosa [Udo longhorn beetle]	Non-AVP	0.064	0.936
dbAMP_11420	Defense protein 2 (DFP-2)	Lonomia obliqua [Moth]	AVP	0.774	0.226
dbAMP_11447	Anionic antimicrobial peptide 2, partial	Galleria mellonella [Greater wax moth]	Non-AVP	0.02	0.98
dbAMP_11532	Attacin (Fragments)	Heliothis virescens [Tobacco budworm moth]	Non-AVP	0.126	0.874
dbAMP_11534	Jellein-2	Apis mellifera [Honeybee]	Non-AVP	0.268	0.732
dbAMP_11535	Jelleine-II	Apis mellifera [Honeybee]	Non-AVP	0.106	0.894
dbAMP_11686	Pyrrhocoricin	Pyrrhocoris apterus [Sap sucking bug]	Non-AVP	0.064	0.936
dbAMP_11688	Metalnikowin-1	Palomena prasina [Green shield bug]	Non-AVP	0.054	0.946
dbAMP_11689	Metalnikowin-2B	Palomena prasina [Green shield bug]	Non-AVP	0.148	0.852
dbAMP_11690	Metalnikowin-2A	Palomena prasina [Green shield bug]	Non-AVP	0.154	0.846
dbAMP_11691	Metalnikowin-3	Palomena prasina [Green shield bug]	Non-AVP	0	1
dbAMP_11692	Oncopeltus antibacte-rial peptide 4	Oncopeltus fasciatus [Large milkweed bug]	AVP	0.64	0.36
dbAMP_11715	Gloverin (Fragments)	Heliothis virescens [Tobacco budworm moth]	Non-AVP	0.036	0.964
dbAMP_11719	Andropin	Drosophila mauritiana [Fruit fly]	AVP	0.752	0.248
dbAMP_11720	Andropin	Drosophila simulans [Fruit fly]	AVP	0.772	0.228
dbAMP_11721	Andropin	Drosophila sechellia [Fruit fly]	AVP	0.818	0.182
dbAMP_11722	Andropin	Drosophila melanogaster [Fruit fly]	AVP	0.742	0.258
dbAMP_11733	DVC-AP1 (Fragment)	Manduca sexta [Tobacco hawkmoth]	AVP	0.964	0.036
dbAMP_11735	CECA2_DROYA Cecropin-A2	Drosophila yakuba [Fruit fly]	AVP	0.558	0.442
dbAMP_11753	Bactrocerin-1	Bactrocera dorsalis [Oriental fruit fly]	AVP	1	0
dbAMP_11768	Spodomicin	Spodoptera littoralis [Egyptian cotton leafworm]	Non-AVP	0	1
dbAMP_11789	Putative defense protein 4 (Fragment)	Antheraea mylitta [Tasar silkworm]	AVP	0.994	0.006
dbAMP_11845	Def-Acaa	Anopheles gambiae [African malaria mosquito]	AVP	0.996	0.004
dbAMP_11846	Defensin	Camponotus floridanus [Florida carpenter ant]	Non-AVP	0.07	0.93
dbAMP_11855	Lasioglossin LL-II	Lasioglossum laticeps	AVP	1	0
dbAMP_11856	Lasioglossin LL-III	Lasioglossum laticeps	AVP	0.93	0.07
dbAMP_11857	Lasioglossin LL-I	Lasioglossum laticeps	Non-AVP	0.498	0.502
dbAMP_11864	Abaecin-like	Apis florea [Dwarf honeybee]	Non-AVP	0.326	0.674
dbAMP_11867	Attacin, partial	Spodoptera exigua [Beet armyworm]	AVP	1	0
dbAMP_11882	Abaecin isoform 1	Bombus terrestris [Buff-tailed bumblebee]	Non-AVP	0.142	0.858
dbAMP_11883	Apolipophorin-3	Galleria mellonella [Greater wax moth]	AVP	0.698	0.302
dbAMP_11923	Tenecin-1	Tenebrio molitor [Yellow mealworm beetle]	Non-AVP	0.43	0.57
dbAMP_11924	Defensin-A	Anomala cuprea [Cupreous chafer beetle]	AVP	0.924	0.076
dbAMP_11925	Defensin-B	Anomala cuprea [Cupreous chafer beetle]	AVP	1	0
dbAMP_11926	Defensin	Allomyrina dichotoma [Japanese rhinoceros beetle]	AVP	0.98	0.02
dbAMP_11927	Defensin-1	Apis mellifera carnica [Carniolan bee]	AVP	0.992	0.008
dbAMP_11928	Royalisin	Apis mellifera [Honeybee]	AVP	0.992	0.008
dbAMP_11929	Royalisin precursor	Apis mellifera [Honeybee]	AVP	0.946	0.054
dbAMP_11930	Defensin	Bombus pascuorum [Brown bumblebee]	AVP	0.826	0.174
dbAMP_11931	Holotricin-1	Holotrichia diomphalia [Korean black chafer]	Non-AVP	0.01	0.99
dbAMP_11932	Coprisin	Copris tripartitus	AVP	0.962	0.038
dbAMP_11933	Defensin-NV	Nasonia vitripennis [Parasitic wasp]	AVP	0.774	0.226
dbAMP_11937	GmoDef	Glossina morsitans [tsetse fly]	AVP	0.946	0.054
dbAMP_11942	Defensin-A	Glossina morsitans morsitans [Savannah tsetse fly]	Non-AVP	0.316	0.684
dbAMP_11994	Gloverin	Spodoptera exigua [Beet armyworm]	AVP	0.694	0.306
dbAMP_12002	Defense protein 4	Lonomia obliqua [Moth]	Non-AVP	0	1
dbAMP_12029	Abaecin (Fragment)	Bombus terrestris [Buff-tailed bumblebee]	AVP	0.928	0.072
dbAMP_12036	Cecropin	Oiketicus kirbyi [Bagworm moth]	Non-AVP	0.27	0.73
dbAMP_12042	Ponericin-W1	Pachycondyla goeldii [Ponerine ant]	AVP	1	0
dbAMP_12043	Ponericin-W2	Pachycondyla goeldii [Ponerine ant]	AVP	1	0
dbAMP_12081	Def-Daa	Anopheles gambiae [African malaria mosquito]	Non-AVP	0.298	0.702
dbAMP_12084	Cecropin-D	Hyalophora cecropia [Cecropia moth]	AVP	1	0
dbAMP_12085	Bactericidin B-4	Manduca sexta [Tobacco hawkmoth]	AVP	1	0
dbAMP_12086	Cecropin-D	Antheraea pernyi [Chinese oak silk moth]	AVP	0.906	0.094
dbAMP_12087	Bactericidin B-3	Manduca sexta [Tobacco hawkmoth]	AVP	1	0
dbAMP_12088	Bactericidin B-5P	Manduca sexta [Tobacco hawkmoth]	AVP	0.968	0.032
dbAMP_12089	Bactericidin B-5P precursor	Manduca sexta [Tobacco hawkmoth]	AVP	0.98	0.02
dbAMP_12090	Bactericidin B-2	Manduca sexta [Tobacco hawkmoth]	AVP	0.992	0.008
dbAMP_12198	Holotricin-3	Holotrichia diomphalia [Korean black chafer]	AVP	0.99	0.01
dbAMP_12201	Putative defense protein Hdd11-like	Manduca sexta [Tobacco hawkmoth]	AVP	0.678	0.322
dbAMP_12225	Megourin-1	Megoura viciae [Vetch aphid]	AVP	0.972	0.028
dbAMP_12226	Megourin-3	Megoura viciae [Vetch aphid]	AVP	0.744	0.256
dbAMP_12227	Megourin-2	Megoura viciae [Vetch aphid]	AVP	0.924	0.076
dbAMP_12247	Putative defense protein Hdd11-like	Samia ricini [Indian eri silkmoth]	AVP	0.878	0.122
dbAMP_12248	Putative defense protein 3	Antheraea mylitta [Tasar silkworm]	Non-AVP	0.004	0.996
dbAMP_12249	Putative defense protein 2	Antheraea mylitta [Tasar silkworm]	Non-AVP	0.004	0.996
dbAMP_12280	Defense protein l(2)34Fc	Drosophila melanogaster [Fruit fly]	Non-AVP	0.268	0.732
dbAMP_12291	Putative defense protein Hdd11	Hyphantria cunea [Fall webworm moth]	AVP	0.678	0.322
dbAMP_12342	Nabaecin-3	Nasonia vitripennis [Parasitic wasp]	AVP	1	0
dbAMP_12343	Abaecin precursor	Apis mellifera [Honeybee]	AVP	0.64	0.36
dbAMP_12344	PP30	Pteromalus puparum	AVP	0.678	0.322

## Sheet: Predicted insect AVPs
	Name	Source	Prediction	AVP	Non.AVP
dbAMP_00045	Defensin-1	Stomoxys calcitrans [Stable fly]	AVP	1	0
dbAMP_00087	Termicin	Pseudacanthotermes spiniger	AVP	0.98	0.02
dbAMP_00221	Defensin precursor	Oryctes rhinoceros [Coconut rhinoceros beetle]	AVP	0.962	0.038
dbAMP_00294	Moricin	Antheraea pernyi [Chinese oak silk moth]	AVP	0.772	0.228
dbAMP_00295	Moricin	Bombyx mori [Silk moth]	AVP	0.828	0.172
dbAMP_00296	Moricin-1, Moricin-2	Bombyx mori [Silk moth]	AVP	0.964	0.036
dbAMP_00416	Moricin II	Hyblaea puera [Teak defoliator]	AVP	0.818	0.182
dbAMP_00479	Cecropin-B	Anopheles gambiae [African malaria mosquito]	AVP	1	0
dbAMP_00608	RprDefA	Rhodnius prolixus [Triatomid bug]	AVP	0.696	0.304
dbAMP_00610	Defensin	Phlebotomus duboscqi [Sandfly]	AVP	0.808	0.192
dbAMP_00614	Defensin-B	Aedes aegypti [Yellowfever mosquito]	AVP	0.676	0.324
dbAMP_00615	Defensin-C	Aedes aegypti [Yellowfever mosquito]	AVP	0.524	0.476
dbAMP_00616	Sapecin-C	Sarcophaga peregrina [Flesh fly]	AVP	0.668	0.332
dbAMP_00620	Phormia defensin A	Phormia terranovae [Northern blowfly]	AVP	0.704	0.296
dbAMP_00622	Lucifensin	Lucilia sericata [Green bottle fly]	AVP	0.744	0.256
dbAMP_00624	Defensin	Drosophila melanogaster [Fruit fly]	AVP	1	0
dbAMP_00625	Defensin 2a	Stomoxys calcitrans [Stable fly]	AVP	0.588	0.412
dbAMP_00679	Locusta migratoria	Locusta migratoria [Migratory locust]	AVP	0.828	0.172
dbAMP_00737	Diapause-specific peptide	Gastrophysa atrocyanea [Leaf beetle]	AVP	0.64	0.36
dbAMP_00857	Antimicrobial peptide Alo-2	Acrocinus longimanus [Giant harlequin beetle]	AVP	0.64	0.36
dbAMP_00860	Antimicrobial peptide Alo-1	Acrocinus longimanus [Giant harlequin beetle]	AVP	0.64	0.36
dbAMP_00861	Antimicrobial peptide Alo-3	Acrocinus longimanus [Giant harlequin beetle]	AVP	0.506	0.494
dbAMP_00862	Alo-3	Acrocinus longimanus [Giant harlequin beetle]	AVP	0.506	0.494
dbAMP_00887	Drosomycin	Drosophila melanogaster [Fruit fly]	AVP	0.994	0.006
dbAMP_00900	Beta-defensin (Fragment)	Spinus spinus [Eurasian siskin]&&Carduelis flammea [Common redpoll]	AVP	0.726	0.274
dbAMP_01025	Diptericin-D	Protophormia terraenovae [Northern blowfly]	AVP	0.85	0.15
dbAMP_01032	Ponericin-G4	Pachycondyla goeldii [Ponerine ant]	AVP	0.716	0.284
dbAMP_01045	Tenecin-3	Tenebrio molitor [Yellow mealworm beetle]	AVP	0.918	0.082
dbAMP_01094	Heliomicin	Heliothis virescens [Tobacco budworm moth]	AVP	0.698	0.302
dbAMP_01097	Heliomicin Mutant	Heliothis virescens [Tobacco budworm moth]	AVP	1	0
dbAMP_01102	Defensin ARD1	Archaeoprepona demophon [One-spotted leafwing butterfly]	AVP	0.704	0.296
dbAMP_01138	Lebocin-3 precursor	Bombyx mori [Silk moth]	AVP	0.984	0.016
dbAMP_01139	Lebocin-1/2 precursor	Bombyx mori [Silk moth]	AVP	0.998	0.002
dbAMP_01248	Pilosulin 5	Myrmecia pilosula [Jack jumper ant]	AVP	0.972	0.028
dbAMP_01278	Lebocin-like anionic peptide 1	Galleria mellonella [Greater wax moth]	AVP	0.98	0.02
dbAMP_01457	Scarabaecin	Oryctes rhinoceros [Coconut rhinoceros beetle]	AVP	0.854	0.146
dbAMP_01474	Cecropin-D-like peptide	Galleria mellonella [Greater wax moth]	AVP	0.93	0.07
dbAMP_01481	Jellein-3	Apis mellifera [Honeybee]	AVP	0.544	0.456
dbAMP_01616	Eumenine mastoparan-ER	Eumenes rubrofemoratus [Solitary wasp]	AVP	0.74	0.26
dbAMP_01617	Pilosulin 4	Myrmecia banksi [Jack jumper ant]	AVP	0.588	0.412
dbAMP_01625	Eumenine mastoparan-EF	Eumenes fraterculus [Solitary wasp]	AVP	0.654	0.346
dbAMP_01789	Ponericin-W6	Pachycondyla goeldii [Ponerine ant]	AVP	0.986	0.014
dbAMP_01803	Andropin	Drosophila teissieri [Fruit fly]	AVP	0.964	0.036
dbAMP_01907	Dinoponeratoxin Da-1837	Dinoponera australis [Giant neotropical hunting ant]	AVP	0.744	0.256
dbAMP_01954	Vespid chemotactic peptide 5g	Vespa magnifica [Hornet]	AVP	0.962	0.038
dbAMP_02036	Vespid chemotactic peptide 5e	Vespa magnifica [Hornet]	AVP	0.854	0.146
dbAMP_02060	Vespid chemotactic peptide 5f	Vespa magnifica [Hornet]	AVP	0.64	0.36
dbAMP_02105	Crabrolin	Vespa crabro [European hornet]	AVP	1	0
dbAMP_02288	Putative defense protein 1	Antheraea mylitta [Tasar silkworm]	AVP	0.63	0.37
dbAMP_02336	Defensin	Formica aquilonia [Red wood ant]	AVP	0.678	0.322
dbAMP_02337	Defensin, isoforms B	Zophobas atratus [Giant mealworm beetle]	AVP	0.774	0.226
dbAMP_02338	Defensin C	Zophobas atratus [Giant mealworm beetle]	AVP	0.892	0.108
dbAMP_02339	Defensin 1 precursor	Acalolepta luxuriosa [Udo longhorn beetle]	AVP	0.742	0.258
dbAMP_02372	Cecropin D (Fragment)	Spodoptera litura [Asian cotton leafworm]	AVP	0.984	0.016
dbAMP_02389	European bumblebee abaecin	Bombus pascuorum [Common carder bumblebee]	AVP	0.542	0.458
dbAMP_02397	Ponericin-W5	Pachycondyla goeldii [Ponerine ant]	AVP	0.92	0.08
dbAMP_02409	PP13	Pteromalus puparum	AVP	0.998	0.002
dbAMP_02556	Defensin	Aeshna cyanea [Southern hawker dragonfly]	AVP	0.698	0.302
dbAMP_02557	Longicin	Haemaphysalis longicornis [Bush tick]	AVP	0.924	0.076
dbAMP_02578	Macropin 1	Macropis fulvipes	AVP	0.892	0.108
dbAMP_02599	Defensin D	Aedes albopictus [Asian tiger mosquito]	AVP	0.982	0.018
dbAMP_02600	Defensin	Aedes albopictus [Asian tiger mosquito]	AVP	0.98	0.02
dbAMP_02652	Osmin	Osmia rufa [Red mason bee]	AVP	0.818	0.182
dbAMP_02655	Melectin	Melecta albifrons [Cuckoo bee]	AVP	1	0
dbAMP_02733	Cecropin-A2	Aedes albopictus [Asian tiger mosquito]	AVP	0.966	0.034
dbAMP_02736	Cecropin-A	Aedes aegypti [Yellowfever mosquito]	AVP	0.966	0.034
dbAMP_02738	AalCecC	Aedes albopictus [Asian tiger mosquito]	AVP	1	0
dbAMP_02883	Melittin	Apis florea [Little honeybee]	AVP	0.726	0.274
dbAMP_02884	Melittin	Apis dorsata [Giant honeybee]	AVP	0.906	0.094
dbAMP_02893	Melittin	Polistes hebraeus [Paper wasp]	AVP	0.822	0.178
dbAMP_02895	Melittin	Vespa magnifica [Hornet]&&Apis mellifera [Honeybee]&&Vespula maculifrons [Eastern yellow jacket]&&Vespa velutina nigrithorax [Hornet]	AVP	1	0
dbAMP_02896	Melittin, minor	Apis mellifera [Honey bee]	AVP	1	0
dbAMP_03186	Ponericin-W4	Pachycondyla goeldii [Ponerine ant]	AVP	0.92	0.08
dbAMP_03187	Ponericin-W3	Pachycondyla goeldii [Ponerine ant]	AVP	1	0
dbAMP_03208	VIRE_HELVI Virescein	Heliothis virescens [Tobacco budworm moth]	AVP	0.962	0.038
dbAMP_03211	Moricin-like peptide B	Galleria mellonella [Greater wax moth]	AVP	0.774	0.226
dbAMP_03212	Manduca Sexta Moricin	Manduca sexta [Tobacco hawkmoth]	AVP	0.742	0.258
dbAMP_03228	Drosocin	Drosophila simulans [Fruit fly]&&Drosophila melanogaster [Fruit fly]	AVP	0.86	0.14
dbAMP_03242	PP113	Pteromalus puparum	AVP	1	0
dbAMP_03243	Halictine 2	Halictus sexcinctus	AVP	0.964	0.036
dbAMP_03451	Pilosulin-1	Myrmecia pilosula [Jack jumper ant]	AVP	0.64	0.36
dbAMP_03475	Ponericin-G5	Pachycondyla goeldii [Ponerine ant]	AVP	0.98	0.02
dbAMP_03476	Dinoponeratoxin Da-3105	Dinoponera australis [Giant neotropical hunting ant]	AVP	0.972	0.028
dbAMP_03479	Dinoponeratoxin Dq-3162/Dq-3163/Dq-3178	Dinoponera quadriceps [South American ant]	AVP	1	0
dbAMP_03566	Anoplin	Anoplius samariensis [Solitary wasp]	AVP	1	0
dbAMP_03573	Cryptonin	Cryptotympana dubia [Korean horse cicada]	AVP	0.528	0.472
dbAMP_03640	Pilosulin-2	Myrmecia pilosula [Jack jumper ant]	AVP	0.762	0.238
dbAMP_03712	Lasiocepsin	Lasioglossum laticeps	AVP	0.966	0.034
dbAMP_03891	Halictine 1	Halictus sexcinctus	AVP	0.92	0.08
dbAMP_03896	CECD_BOMMO Cecropin-D precursor	Bombyx mori [Silk moth]	AVP	0.892	0.108
dbAMP_03904	Apidaecin-2	Apis mellifera [Honeybee]	AVP	0.508	0.492
dbAMP_03988	Eumenine mastoparan-OD	Orancistrocerus drewseni [Solitary wasp]	AVP	0.984	0.016
dbAMP_04003	Cecropin-A precursor	Anopheles gambiae [African malaria mosquito]	AVP	0.774	0.226
dbAMP_04004	Cecropin-B1	Culex pipiens pipiens [Northern house mosquito]	AVP	0.586	0.414
dbAMP_04007	Formaecin-1	Myrmecia gulosa [Red bulldog ant]	AVP	0.672	0.328
dbAMP_04034	Cecropin-B2	Culex pipiens pipiens [Northern house mosquito]	AVP	0.752	0.248
dbAMP_04051	PP102	Pteromalus puparum	AVP	0.508	0.492
dbAMP_04078	Thanatin	Podisus maculiventris [Spined soldier bug]	AVP	0.982	0.018
dbAMP_04092	Md-Cec	Musca domestica (house fly ) [House fly]	AVP	0.668	0.332
dbAMP_04121	Macropin 2	Macropis fulvipes	AVP	0.936	0.064
dbAMP_04182	Antibacterial peptide	Harmonia axyridis [Multicolored Asian lady beetle]	AVP	0.716	0.284
dbAMP_04294	Gallerimycin	Galleria mellonella [Greater wax moth]	AVP	0.996	0.004
dbAMP_04353	Ponericin-G2	Pachycondyla goeldii [Ponerine ant]	AVP	0.964	0.036
dbAMP_04354	Ponericin-G3	Pachycondyla goeldii [Ponerine ant]	AVP	0.762	0.238
dbAMP_04355	Hinnavin I	Artogeia rapae [Small white butterfly]	AVP	0.752	0.248
dbAMP_04366	DmCecA	Aedes albopictus [Asian tiger mosquito]	AVP	0.586	0.414
dbAMP_04367	CEC1_DROVI Cecropin-1 precursor	Drosophila virilis [Fruit fly]	AVP	0.954	0.046
dbAMP_04369	Sarcotoxin-1A&&CEC2_DROVI Cecropin-2 precursor	Sarcophaga peregrina [Flesh fly]&&Drosophila virilis [Fruit fly]	AVP	0.726	0.274
dbAMP_04370	Cecropin-A1/A2	Drosophila melanogaster [Fruit fly]	AVP	0.892	0.108
dbAMP_04371	CECA1_DROSE Cecropin-A1 precursor&&Cecropin-A1	Drosophila sechellia [Fruit fly]&&Drosophila mauritiana [Fruit fly]	AVP	1	0
dbAMP_04372	Cecropin-1	Ceratitis capitata [Mediterranean fruit fly]	AVP	0.544	0.456
dbAMP_04373	Cecropin-2	Ceratitis capitata [Mediterranean fruit fly]	AVP	0.906	0.094
dbAMP_04375	Sarcotoxin-1B	Sarcophaga peregrina [Flesh fly]	AVP	0.752	0.248
dbAMP_04377	Sarcotoxin Pd	Paederus dermatitis	AVP	1	0
dbAMP_04379	Cecropin-C&&CECC_DROSI Cecropin-C precursor&&CECC_DROTE Cecropin-C precursor&&CECC_DROTK Cecropin-C precursor&&CECC_DROOR Cecropin-C precursor	Drosophila mauritiana [Fruit fly]&&Drosophila simulans [Fruit fly]&&Drosophila teissieri [Fruit fly]&&Drosophila takahashii [Fruit fly]&&Drosophila orena [Fruit fly]&&Drosophila erecta [Fruit fly]&&Drosophila sechellia [Fruit fly]&&Drosophila yakuba [Fruit fly]	AVP	0.998	0.002
dbAMP_04387	Sarcotoxin-1C	Sarcophaga peregrina [Flesh fly]	AVP	0.64	0.36
dbAMP_04389	Cecropin-B	Drosophila melanogaster [Fruit fly]	AVP	0.906	0.094
dbAMP_04422	Probable antibacterial peptide	Riptortus clavatus [Bean bug]	AVP	0.81	0.19
dbAMP_04472	Alloferon-1	Calliphora vicina [Blue blowfly]	AVP	0.788	0.212
dbAMP_04560	Mastoparan-1	Polybia paulista [Neotropical social wasp]	AVP	0.744	0.256
dbAMP_04561	Pilosulin 2	Myrmecia pilosula [Jack jumper ant]	AVP	0.586	0.414
dbAMP_04562	Polybia-MP-II	Polybia paulista [Neotropical social wasp]	AVP	0.588	0.412
dbAMP_04591	Andropin	Drosophila yakuba [Fruit fly]	AVP	0.992	0.008
dbAMP_04597	HaA4	Harmonia axyridis [Multicolored Asian lady beetle]	AVP	0.744	0.256
dbAMP_04636	Pilosulin 3	Myrmecia banksi [Jack jumper ant]	AVP	0.588	0.412
dbAMP_04655	Bombolitin III	Megabombus pennsylvanicus [American common bumblebee]	AVP	0.704	0.296
dbAMP_04660	Bombolitin I	Megabombus pennsylvanicus [American common bumblebee]	AVP	0.928	0.072
dbAMP_04783	Bombolitin IV	Megabombus pennsylvanicus [American common bumblebee]	AVP	0.694	0.306
dbAMP_04784	Mastoparan-T	Vespa tropica [Greater banded hornet]	AVP	0.962	0.038
dbAMP_04789	Mastoparan-like peptide 12d	Vespa magnifica [Hornet]	AVP	0.846	0.154
dbAMP_04798	Eumenine mastoparan-AF	Anterhynchium flavomarginatum micado [Solitary wasp]	AVP	0.936	0.064
dbAMP_04799	MP-VB1	Vespa bicolor	AVP	0.698	0.302
dbAMP_04810	MASTP_PROSY Mastoparan	Protonectarina sylveirae [Brazilian wasp]	AVP	0.972	0.028
dbAMP_04812	Mastoparan-like peptide 12b	Vespa magnifica [Hornet]	AVP	0.946	0.054
dbAMP_04813	Dominulin-B	Polistes dominulus [European paper wasp]	AVP	0.906	0.094
dbAMP_04814	Dominulin-A	Polistes dominulus [European paper wasp]	AVP	0.822	0.178
dbAMP_04815	Pm_mastoparan PMM	Polistes dorsalis [Paper wasp]	AVP	1	0
dbAMP_04816	Pd_mastoparan PDD-A	Polistes dorsalis [Paper wasp]	AVP	0.998	0.002
dbAMP_04817	Mastoparan-V1	Vespula vulgaris [Yellow jacket]	AVP	0.64	0.36
dbAMP_04818	Mastoparan-V2	Vespula vulgaris [Yellow jacket]	AVP	0.668	0.332
dbAMP_04823	Pd_mastoparan PDD-B	Polistes dorsalis [Paper wasp]	AVP	0.988	0.012
dbAMP_04824	Mp_mastoparan MP	Polistes dorsalis [Paper wasp]	AVP	0.97	0.03
dbAMP_04868	Nahymenoptaecin-2 precursor	Nasonia vitripennis [Parasitic wasp]	AVP	0.736	0.264
dbAMP_05020	DVC-AP3-2 (Fragment)	Manduca sexta [Tobacco hawkmoth]	AVP	1	0
dbAMP_05031	Moricin-like peptide D	Galleria mellonella [Greater wax moth]	AVP	1	0
dbAMP_05089	Bicarinalin	Tetramorium bicarinatum	AVP	0.968	0.032
dbAMP_05101	Antimicrobial peptide moricin	Danaus plexippus [Monarch butterfly]	AVP	0.506	0.494
dbAMP_05150	Spingerin C-4	Pseudacanthotermes spiniger	AVP	0.892	0.108
dbAMP_05218	PxCECA1	Plutella xylostella [Diamondback moth]	AVP	0.998	0.002
dbAMP_05267	Antibacterial protein	Antheraea mylitta [Tasar silkworm]	AVP	0.994	0.006
dbAMP_05391	Lysozyme	Bombyx mori [Silk moth]	AVP	0.678	0.322
dbAMP_05446	G. mellonella moricin-like peptide A	Galleria mellonella [Greater wax moth]	AVP	0.63	0.37
dbAMP_05448	Moricin-like peptide C1	Galleria mellonella [Greater wax moth]	AVP	0.962	0.038
dbAMP_05449	Moricin-like peptide C3	Galleria mellonella [Greater wax moth]	AVP	0.964	0.036
dbAMP_05450	Moricin-like peptide C2	Galleria mellonella [Greater wax moth]	AVP	0.97	0.03
dbAMP_05451	Moricin-like peptide C4, Moricin-like peptide C5	Galleria mellonella [Greater wax moth]	AVP	0.98	0.02
dbAMP_05486	Hinnavin II	Artogeia rapae [Small white butterfly]	AVP	0.962	0.038
dbAMP_05488	Cecropin-B	Antheraea pernyi [Chinese oak silk moth]	AVP	1	0
dbAMP_05494	Cecropin-A	Hyalophora cecropia [Cecropia moth]	AVP	0.996	0.004
dbAMP_05533	Cecropin B	Hyalophora cecropia [Cecropia moth]	AVP	0.998	0.002
dbAMP_05534	Cecropin-B	Hyalophora cecropia [Cecropia moth]	AVP	1	0
dbAMP_05535	Cecropin-B	Heliothis virescens [Tobacco budworm moth]	AVP	0.972	0.028
dbAMP_05645	Panurgine K	Panurgus calcaratus	AVP	0.726	0.274
dbAMP_05646	Panurgine R	Panurgus calcaratus	AVP	0.972	0.028
dbAMP_05709	Cecropin (Fragment)	Hyalophora cecropia [Cecropia moth]	AVP	0.954	0.046
dbAMP_05745	Lucilin, partial	Lucilia sericata [Green bottle fly]	AVP	0.918	0.082
dbAMP_05796	Bombolitin-7	Bombus lapidarius [Red-tailed bumblebee]	AVP	0.752	0.248
dbAMP_05798	Mastoparan B	Vespa basalis [Hornet]	AVP	0.994	0.006
dbAMP_05855	Ponericin-L2	Pachycondyla goeldii [Ponerine ant]	AVP	1	0
dbAMP_05899	Panurgine 1	Panurgus calcaratus	AVP	0.98	0.02
dbAMP_06007	Mastoparan-S	Sphodromantis viridis [Giant African praying mantis)]	AVP	1	0
dbAMP_06059	Sapecin-B	Sarcophaga peregrina [Flesh fly]	AVP	0.854	0.146
dbAMP_06220	PREDICTED: abaecin isoform X1 [Apis mellifera].	Apis mellifera [Honey bee]	AVP	0.922	0.078
dbAMP_06315	Transferrin	Bombyx mori [Silk moth]	AVP	0.704	0.296
dbAMP_06417	Transferrin	Drosophila silvestris [Fruit fly]	AVP	0.774	0.226
dbAMP_06488	LD22449p (Transferrin 2)	Drosophila melanogaster [Fruit fly]	AVP	1	0
dbAMP_06570	Thaumatin-like protein 1	Coptotermes formosanus [Formosan subterranean termite]	AVP	0.906	0.094
dbAMP_06593	PREDICTED: thaumatin-like protein	Acyrthosiphon pisum [Pea aphid]	AVP	0.998	0.002
dbAMP_06594	PREDICTED: thaumatin-like protein 1b	Acyrthosiphon pisum [Pea aphid]	AVP	0.998	0.002
dbAMP_06596	Cecropin-A	Danaus plexippus [Monarch butterfly]	AVP	1	0
dbAMP_07526	PREDICTED: abaecin-like [Apis dorsata].	Apis dorsata [Giant honeybee]	AVP	1	0
dbAMP_07565	Transferrin	Plutella xylostella [Diamondback moth]	AVP	0.98	0.02
dbAMP_07774	Abaesin	Bombus ignitus [Bumblebee]	AVP	1	0
dbAMP_07775	Nasonin-1	Nasonia vitripennis [Parasitic wasp]	AVP	0.984	0.016
dbAMP_07810	Cecropin F2	Spodoptera exigua [beet armyworm ]	AVP	0.762	0.238
dbAMP_07817	Cecropin-D	Danaus plexippus [Monarch butterfly]	AVP	0.528	0.472
dbAMP_07830	Defensin	Apis cerana japonica	AVP	0.992	0.008
dbAMP_07831	Defensin	Apis cerana japonica	AVP	0.968	0.032
dbAMP_07832	Defensin	Apis cerana japonica	AVP	0.972	0.028
dbAMP_07833	Defensin	Apis cerana japonica	AVP	1	0
dbAMP_07835	Defensin	Apis cerana japonica	AVP	0.954	0.046
dbAMP_07836	Hyphancin-3E	Danaus plexippus [Monarch butterfly]	AVP	0.964	0.036
dbAMP_07837	Abaecin	Manica rubida	AVP	0.988	0.012
dbAMP_07838	Abaecin	Acromyrmex echinatior [Panamanian leafcutter ant]	AVP	0.992	0.008
dbAMP_07841	Hymenoptaecin	Bombus ignitus [Bumblebee]	AVP	0.524	0.476
dbAMP_07843	PREDICTED: hymenoptaecin-like [Apis florea].	Apis florea [Little honeybee]	AVP	0.63	0.37
dbAMP_07844	Hymenoptaecin (Fragment)	Apis dorsata [Giant honeybee]	AVP	0.542	0.458
dbAMP_07868	PREDICTED: melittin-like	Apis florea [Little honeybee]	AVP	0.98	0.02
dbAMP_07879	Cecropin F1	Spodoptera exigua [beet armyworm ]	AVP	0.996	0.004
dbAMP_07882	CEC-A	Anopheles merus [Mosquito]	AVP	0.93	0.07
dbAMP_07883	Cecropin A1	Spodoptera exigua [beet armyworm ]	AVP	1	0
dbAMP_07884	Cecropin D	Spodoptera exigua [beet armyworm ]	AVP	1	0
dbAMP_07886	Antimicrobial peptide cecropin 6	Manduca sexta [Tobacco hawkmoth]	AVP	1	0
dbAMP_07891	Moricin-like peptide A	Galleria mellonella [Greater wax moth]	AVP	1	0
dbAMP_07894	Virescein	Heliothis virescens [Tobacco budworm moth]	AVP	0.558	0.442
dbAMP_07895	Moricin	Helicoverpa armigera [Cotton bollworm]	AVP	0.974	0.026
dbAMP_07896	Cecropin	Acalolepta luxuriosa [Udo longhorn beetle]	AVP	1	0
dbAMP_07898	Abaecin	Myrmica rubra&&Myrmica ruginodis [Red ant]&&Myrmica sulcinodis&&Myrmica fracticornis	AVP	0.752	0.248
dbAMP_07899	Abaecin	Myrmica alaskensis&&Myrmica scabrinodis&&Myrmica brevispinosa&&Myrmica lobicornis&&Myrmica sabuleti&&Myrmica rugulosa	AVP	0.992	0.008
dbAMP_07917	Antifungal peptide gallerimycin	Galleria mellonella [Greater wax moth]	AVP	1	0
dbAMP_07994	Moricin-like peptide C4	Danaus plexippus [Monarch butterfly]	AVP	0.752	0.248
dbAMP_08014	Hymenoptaecin	Harpegnathos saltator [Jerdon's jumping ant]	AVP	0.64	0.36
dbAMP_08038	Transferrin	Apriona germari [Mulberry longhorn beetle]	AVP	0.854	0.146
dbAMP_08065	Antimicrobial peptide defensin 1-1	Nasonia vitripennis [Parasitic wasp]	AVP	0.964	0.036
dbAMP_08079	Defensin prepropeptide	Camponotus floridanus [Florida carpenter ant]	AVP	0.854	0.146
dbAMP_08081	Hymenoptaecin	Harpegnathos saltator [Jerdon's jumping ant]	AVP	0.64	0.36
dbAMP_08093	Antibacterial peptide cecropin 1	Plutella xylostella [Diamondback moth]	AVP	1	0
dbAMP_08094	Antimicrobial peptide cecropin	Plutella xylostella [Diamondback moth]	AVP	0.992	0.008
dbAMP_08365	Moricin B3	Bombyx mori [Silk moth]&&Bombyx mandarina [Wild silk moth]	AVP	1	0
dbAMP_08368	Moricin B3	Bombyx mandarina [Wild silk moth]	AVP	0.974	0.026
dbAMP_08410	Transferrin	Solenopsis invicta [Red imported fire ant]	AVP	0.962	0.038
dbAMP_08417	Proline-rich protein	Galleria mellonella [Greater wax moth]	AVP	0.982	0.018
dbAMP_08474	Coleoptericin	Copris tripartitus	AVP	0.524	0.476
dbAMP_08478	Coleoptericin B	Trypoxylus dichotomus [Japanese rhinoceros beetle]	AVP	0.994	0.006
dbAMP_08519	Cecropin B	Bombyx mori [Silk moth]	AVP	1	0
dbAMP_08520	Cecropin CBM2	Bombyx mori [Silk moth]	AVP	0.536	0.464
dbAMP_08521	Cecropin CBM2-2	Bombyx mori [Silk moth]	AVP	0.554	0.446
dbAMP_08522	Cecropin 2	Helicoverpa armigera [Cotton bollworm]	AVP	0.964	0.036
dbAMP_08524	Cecropin-A	Danaus plexippus [Monarch butterfly]	AVP	0.98	0.02
dbAMP_08525	Cecropin	Papilio xuthus [Asian swallowtail butterfly]	AVP	0.996	0.004
dbAMP_08526	Cecropin	Papilio xuthus [Asian swallowtail butterfly]	AVP	0.972	0.028
dbAMP_08529	Cecropin A	Pseudoplusia includens [Soybean looper]	AVP	0.964	0.036
dbAMP_08531	CEC2 protein	Anopheles arabiensis [Mosquito]	AVP	0.772	0.228
dbAMP_08718	MIP29670p1	Drosophila melanogaster [Fruit fly]	AVP	1	0
dbAMP_08719	Cecropin B	Drosophila melanogaster [Fruit fly]	AVP	1	0
dbAMP_08720	Cecropin	Culex quinquefasciatus [Southern house mosquito]&&Culex pipiens pipiens [Northern house mosquito]	AVP	0.95	0.05
dbAMP_08721	AAEL000625-PA	Aedes aegypti [Yellowfever mosquito]	AVP	0.772	0.228
dbAMP_08722	AAEL004223-PA	Aedes aegypti [Yellowfever mosquito]	AVP	0.962	0.038
dbAMP_08724	Cecropin (Fragment)	Musca domestica [House fly]	AVP	0.982	0.018
dbAMP_08725	Cecropin A	Culex quinquefasciatus [Southern house mosquito]	AVP	1	0
dbAMP_08726	Sarcotoxin-G	Musca domestica [House fly]	AVP	0.54	0.46
dbAMP_08727	Cecropin	Bactrocera dorsalis [oriental fruit fly ]	AVP	0.54	0.46
dbAMP_08729	Cecropin	Musca domestica [House fly]	AVP	1	0
dbAMP_08730	AAEL000621-PA	Aedes aegypti [Yellowfever mosquito]	AVP	0.77	0.23
dbAMP_08732	CEC-A	Anopheles melas	AVP	0.98	0.02
dbAMP_08733	CEC-A	Anopheles melas	AVP	0.972	0.028
dbAMP_08734	CEC-A	Anopheles merus [Mosquito]	AVP	0.98	0.02
dbAMP_08735	CEC-A	Anopheles arabiensis [Mosquito]&&Anopheles quadriannulatus [Mosquito]&&Anopheles melas	AVP	0.972	0.028
dbAMP_08736	CEC-A	Anopheles arabiensis [Mosquito]	AVP	0.968	0.032
dbAMP_08737	CEC-A	Anopheles bwambae&&Anopheles melas&&Anopheles merus [Mosquito]	AVP	0.93	0.07
dbAMP_08738	CEC-A	Anopheles quadriannulatus [Mosquito]	AVP	0.968	0.032
dbAMP_08739	CEC-A	Anopheles arabiensis [Mosquito]	AVP	0.968	0.032
dbAMP_08741	AAEL000611-PA	Aedes aegypti [Yellowfever mosquito]	AVP	0.752	0.248
dbAMP_08742	Cecropin E	Bombyx mori [Silk moth]	AVP	0.962	0.038
dbAMP_08746	Cecropin 1	Helicoverpa armigera [Cotton bollworm]	AVP	0.746	0.254
dbAMP_08748	Cecropin	Spodoptera littoralis [Egyptian cotton leafworm]	AVP	0.954	0.046
dbAMP_08750	Cecropin	Helicoverpa armigera [Cotton bollworm]	AVP	0.988	0.012
dbAMP_08751	Cecropin B	Trichoplusia ni [Cabbage looper]	AVP	0.99	0.01
dbAMP_08752	Cecropin E	Spodoptera exigua [beet armyworm ]	AVP	1	0
dbAMP_08755	Cecropin-like protein	Antheraea mylitta [Tasar silkworm]	AVP	0.746	0.254
dbAMP_08756	Cecropin-like protein	Antheraea mylitta [Tasar silkworm]	AVP	0.946	0.054
dbAMP_08757	Cecropin-like protein	Antheraea pernyi [Chinese oak silk moth]	AVP	0.528	0.472
dbAMP_08758	AAEL000598-PA	Aedes aegypti [Yellowfever mosquito]	AVP	0.994	0.006
dbAMP_08759	Cecropin 3	Anopheles albimanus [New world malaria mosquito]	AVP	0.954	0.046
dbAMP_08761	AAEL015515-PA	Aedes aegypti [Yellowfever mosquito]	AVP	0.908	0.092
dbAMP_08763	Enbocin3	Bombyx mori [Silk moth]	AVP	0.854	0.146
dbAMP_08765	PREDICTED: cecropin-like	Bombyx mori [Silk moth]	AVP	0.762	0.238
dbAMP_08767	Cecropin A	Bombyx mori [Silk moth]	AVP	1	0
dbAMP_08769	CecC	Drosophila erecta [Fruit fly]	AVP	0.554	0.446
dbAMP_08773	Cecropin II1	Drosophila subobscura [Fruit fly]	AVP	1	0
dbAMP_08777	Cecropin I	Drosophila subobscura [Fruit fly]	AVP	0.77	0.23
dbAMP_08846	Cecropin-like protein	Antheraea mylitta [Tasar silkworm]	AVP	0.774	0.226
dbAMP_08847	Cecropin C	Spodoptera exigua [beet armyworm ]	AVP	0.906	0.094
dbAMP_08848	HacD	Helicoverpa armigera [Cotton bollworm]	AVP	1	0
dbAMP_08855	Cecropin-like protein	Antheraea pernyi [Chinese oak silk moth]	AVP	0.892	0.108
dbAMP_08882	Cecropin-A	Danaus plexippus [Monarch butterfly]	AVP	0.916	0.084
dbAMP_08883	Cecropin-A	Danaus plexippus [Monarch butterfly]	AVP	0.558	0.442
dbAMP_08884	CecII	Drosophila pseudoobscura pseudoobscura [Fruit fly]	AVP	0.536	0.464
dbAMP_08885	Cecropin II	Drosophila pseudoobscura pseudoobscura [Fruit fly]	AVP	0.972	0.028
dbAMP_08948	Mtk	Drosophila simulans [Fruit fly]	AVP	0.962	0.038
dbAMP_08949	Metchnikowin	Drosophila simulans [Fruit fly]	AVP	1	0
dbAMP_08952	TnGlv1	Trichoplusia ni [Cabbage looper]	AVP	0.544	0.456
dbAMP_08953	Transferrin 2	Aedes aegypti [Yellowfever mosquito]	AVP	0.986	0.014
dbAMP_08982	TnGlv2	Trichoplusia ni [Cabbage looper]	AVP	0.984	0.016
dbAMP_09019	Antibacterial peptide moricin	Plutella xylostella [diamondback moth ]	AVP	0.98	0.02
dbAMP_09068	Melittin	Polistes sp. [Golden paper wasp]	AVP	0.966	0.034
dbAMP_09348	Transferrin	Periplaneta americana [American cockroach]	AVP	0.668	0.332
dbAMP_09363	Hepcidin	Pteropus alecto [Black flying fox]	AVP	0.906	0.094
dbAMP_09381	Lactotransferrin	Pteropus alecto [Black flying fox]	AVP	1	0
dbAMP_09420	Cecropin 2 precursor	Tribolium castaneum [Red flour beetle]	AVP	0.936	0.064
dbAMP_09421	Antimicrobial peptide	Tribolium castaneum [Red flour beetle]	AVP	0.982	0.018
dbAMP_09503	Coleoptericin 1	Sitophilus zeamais [Maize weevil]	AVP	0.676	0.324
dbAMP_09552	AAEL015639-PA (Fragment)	Aedes aegypti [Yellowfever mosquito]	AVP	0.982	0.018
dbAMP_09564	Gambicin	Anopheles gambiae [African malaria mosquito]	AVP	0.542	0.458
dbAMP_09565	Gambicin	Anopheles gambiae [African malaria mosquito]	AVP	0.996	0.004
dbAMP_09627	PREDICTED: defense protein 4-like [Bombyx mori].	Bombyx mori [Domestic silkworm]	AVP	1	0
dbAMP_09628	Antibacterial peptide	Bombyx mori [Silk moth]	AVP	0.558	0.442
dbAMP_09774	Cecropin-D	Agrius convolvuli [Morning glory sphinx moth]	AVP	1	0
dbAMP_09871	Lebocin	Pseudoplusia includens [Soybean looper]	AVP	0.696	0.304
dbAMP_09873	Pilosulin 4	Myrmecia pilosula [Jack jumper ant]	AVP	0.63	0.37
dbAMP_09903	Jellein-1	Apis mellifera [Honeybee]	AVP	0.998	0.002
dbAMP_09904	Jelleine-I	Apis mellifera [Honeybee]	AVP	0.668	0.332
dbAMP_09974	Abaecin-like	Bombus impatiens [Bumblebee]	AVP	0.64	0.36
dbAMP_09997	Beta-defensin 2 (Fragment)	Muscicapa striata [Spotted flycatcher]	AVP	0.77	0.23
dbAMP_10021	CECE_BOMMO Antibacterial peptide enbocin precursor	Bombyx mori [Silk moth]	AVP	0.508	0.492
dbAMP_10075	Hymenoptaecin	Apis mellifera [Honeybee]	AVP	0.542	0.458
dbAMP_10092	Hymenoptaecin (Fragment)	Apis mellifera mellifera [German honeybee]	AVP	0.542	0.458
dbAMP_10106	Antifungal protein	Sarcophaga peregrina [Flesh fly]	AVP	0.996	0.004
dbAMP_10159	Sarcotoxin-2A	Sarcophaga peregrina [Flesh fly]	AVP	0.64	0.36
dbAMP_10212	Salivary cecropin (Fragment)	Anopheles stephensi [Indo-Pakistan malaria mosquito]	AVP	0.98	0.02
dbAMP_10246	HELN_HELVI Heliocin	Heliothis virescens [Tobacco budworm moth]	AVP	0.752	0.248
dbAMP_10261	Andropin	Drosophila orena [Fruit fly]	AVP	0.946	0.054
dbAMP_10262	CECA1_DROSI Cecropin-A1 precursor	Drosophila simulans [Fruit fly]	AVP	0.962	0.038
dbAMP_10286	Attacin-B	Drosophila melanogaster [Fruit fly]	AVP	0.63	0.37
dbAMP_10426	Stomoxyn	Stomoxys calcitrans [Stable fly]	AVP	0.86	0.14
dbAMP_10506	Antimicrobial peptide moricin	Danaus plexippus [Monarch butterfly]	AVP	0.98	0.02
dbAMP_10658	Cecropin-C	Anopheles gambiae [African malaria mosquito]	AVP	0.828	0.172
dbAMP_10853	Lysozyme	Pseudoplusia includens [Soybean looper]	AVP	0.742	0.258
dbAMP_10854	Cecropin-A	Trichoplusia ni [Cabbage looper]	AVP	0.77	0.23
dbAMP_10855	Hyphancin-3E	Hyphantria cunea [Fall webworm moth]	AVP	0.788	0.212
dbAMP_10856	Cecropin B1	Bombyx mori [Silk moth]	AVP	0.95	0.05
dbAMP_10858	CEC4_BOMMO Cecropin	Bombyx mori [Silk moth]	AVP	0.772	0.228
dbAMP_10859	Papiliocin	Papilio xuthus [Asian swallowtail butterfly]	AVP	0.968	0.032
dbAMP_10861	Hyphancin-3D	Hyphantria cunea [Fall webworm moth]	AVP	0.984	0.016
dbAMP_10862	Cecropin A1, Lepidopteran C.	Bombyx mori [Silk moth]	AVP	1	0
dbAMP_10864	Cecropin-B	Spodoptera litura [Asian cotton leafworm]	AVP	0.926	0.074
dbAMP_10865	Cecropin-C	Heliothis virescens [Tobacco budworm moth]	AVP	0.984	0.016
dbAMP_10866	Hyphancin-3G	Hyphantria cunea [Fall webworm moth]	AVP	0.554	0.446
dbAMP_10868	Hyphancin-3F	Hyphantria cunea [Fall webworm moth]	AVP	0.908	0.092
dbAMP_10869	Cecropin-A	Spodoptera litura [Asian cotton leafworm]	AVP	0.974	0.026
dbAMP_10959	Antimicrobial peptide Def1-2	Nasonia vitripennis [Parasitic wasp]	AVP	0.968	0.032
dbAMP_10960	Antimicrobial peptide Def1-1	Nasonia vitripennis [Parasitic wasp]	AVP	0.77	0.23
dbAMP_11037	Ceratotoxin-B	Ceratitis capitata [Mediterranean fruit fly]	AVP	0.994	0.006
dbAMP_11038	Ceratotoxin-A	Ceratitis capitata [Mediterranean fruit fly]	AVP	0.972	0.028
dbAMP_11086	Bombolitin II	Megabombus pennsylvanicus [American common bumblebee]	AVP	0.854	0.146
dbAMP_11093	Defensin	Triatoma infestans [Assassin bug]	AVP	0.772	0.228
dbAMP_11094	Defensin C	Rhodnius prolixus [Triatomid bug]	AVP	1	0
dbAMP_11096	Defensin 4	Triatoma brasiliensis [Blood-sucking bug]	AVP	0.972	0.028
dbAMP_11136	Decoralin	Oreumenes decoratus [Potter wasp]	AVP	0.786	0.214
dbAMP_11140	Coleoptericin	Zophobas atratus [Giant mealworm beetle]	AVP	0.752	0.248
dbAMP_11142	Haxy_Col1	Harmonia axyridis [Multicolored Asian lady beetle]	AVP	0.998	0.002
dbAMP_11143	Rhinocerosin	Oryctes rhinoceros [Coconut rhinoceros beetle]	AVP	0.678	0.322
dbAMP_11146	Holotricin-2	Holotrichia diomphalia [Korean black chafer]	AVP	0.536	0.464
dbAMP_11215	SK84	Drosophila virilis [Fruit fly]	AVP	0.668	0.332
dbAMP_11218	Def-Bat	Anopheles gambiae [African malaria mosquito]	AVP	0.996	0.004
dbAMP_11219	Def-Bbb	Anopheles gambiae [African malaria mosquito]	AVP	1	0
dbAMP_11420	Defense protein 2 (DFP-2)	Lonomia obliqua [Moth]	AVP	0.774	0.226
dbAMP_11692	Oncopeltus antibacte-rial peptide 4	Oncopeltus fasciatus [Large milkweed bug]	AVP	0.64	0.36
dbAMP_11719	Andropin	Drosophila mauritiana [Fruit fly]	AVP	0.752	0.248
dbAMP_11720	Andropin	Drosophila simulans [Fruit fly]	AVP	0.772	0.228
dbAMP_11721	Andropin	Drosophila sechellia [Fruit fly]	AVP	0.818	0.182
dbAMP_11722	Andropin	Drosophila melanogaster [Fruit fly]	AVP	0.742	0.258
dbAMP_11733	DVC-AP1 (Fragment)	Manduca sexta [Tobacco hawkmoth]	AVP	0.964	0.036
dbAMP_11735	CECA2_DROYA Cecropin-A2	Drosophila yakuba [Fruit fly]	AVP	0.558	0.442
dbAMP_11753	Bactrocerin-1	Bactrocera dorsalis [Oriental fruit fly]	AVP	1	0
dbAMP_11789	Putative defense protein 4 (Fragment)	Antheraea mylitta [Tasar silkworm]	AVP	0.994	0.006
dbAMP_11845	Def-Acaa	Anopheles gambiae [African malaria mosquito]	AVP	0.996	0.004
dbAMP_11855	Lasioglossin LL-II	Lasioglossum laticeps	AVP	1	0
dbAMP_11856	Lasioglossin LL-III	Lasioglossum laticeps	AVP	0.93	0.07
dbAMP_11867	Attacin, partial	Spodoptera exigua [Beet armyworm]	AVP	1	0
dbAMP_11883	Apolipophorin-3	Galleria mellonella [Greater wax moth]	AVP	0.698	0.302
dbAMP_11924	Defensin-A	Anomala cuprea [Cupreous chafer beetle]	AVP	0.924	0.076
dbAMP_11925	Defensin-B	Anomala cuprea [Cupreous chafer beetle]	AVP	1	0
dbAMP_11926	Defensin	Allomyrina dichotoma [Japanese rhinoceros beetle]	AVP	0.98	0.02
dbAMP_11927	Defensin-1	Apis mellifera carnica [Carniolan bee]	AVP	0.992	0.008
dbAMP_11928	Royalisin	Apis mellifera [Honeybee]	AVP	0.992	0.008
dbAMP_11929	Royalisin precursor	Apis mellifera [Honeybee]	AVP	0.946	0.054
dbAMP_11930	Defensin	Bombus pascuorum [Brown bumblebee]	AVP	0.826	0.174
dbAMP_11932	Coprisin	Copris tripartitus	AVP	0.962	0.038
dbAMP_11933	Defensin-NV	Nasonia vitripennis [Parasitic wasp]	AVP	0.774	0.226
dbAMP_11937	GmoDef	Glossina morsitans [tsetse fly]	AVP	0.946	0.054
dbAMP_11994	Gloverin	Spodoptera exigua [Beet armyworm]	AVP	0.694	0.306
dbAMP_12029	Abaecin (Fragment)	Bombus terrestris [Buff-tailed bumblebee]	AVP	0.928	0.072
dbAMP_12042	Ponericin-W1	Pachycondyla goeldii [Ponerine ant]	AVP	1	0
dbAMP_12043	Ponericin-W2	Pachycondyla goeldii [Ponerine ant]	AVP	1	0
dbAMP_12084	Cecropin-D	Hyalophora cecropia [Cecropia moth]	AVP	1	0
dbAMP_12085	Bactericidin B-4	Manduca sexta [Tobacco hawkmoth]	AVP	1	0
dbAMP_12086	Cecropin-D	Antheraea pernyi [Chinese oak silk moth]	AVP	0.906	0.094
dbAMP_12087	Bactericidin B-3	Manduca sexta [Tobacco hawkmoth]	AVP	1	0
dbAMP_12088	Bactericidin B-5P	Manduca sexta [Tobacco hawkmoth]	AVP	0.968	0.032
dbAMP_12089	Bactericidin B-5P precursor	Manduca sexta [Tobacco hawkmoth]	AVP	0.98	0.02
dbAMP_12090	Bactericidin B-2	Manduca sexta [Tobacco hawkmoth]	AVP	0.992	0.008
dbAMP_12198	Holotricin-3	Holotrichia diomphalia [Korean black chafer]	AVP	0.99	0.01
dbAMP_12201	Putative defense protein Hdd11-like	Manduca sexta [Tobacco hawkmoth]	AVP	0.678	0.322
dbAMP_12225	Megourin-1	Megoura viciae [Vetch aphid]	AVP	0.972	0.028
dbAMP_12226	Megourin-3	Megoura viciae [Vetch aphid]	AVP	0.744	0.256
dbAMP_12227	Megourin-2	Megoura viciae [Vetch aphid]	AVP	0.924	0.076
dbAMP_12247	Putative defense protein Hdd11-like	Samia ricini [Indian eri silkmoth]	AVP	0.878	0.122
dbAMP_12291	Putative defense protein Hdd11	Hyphantria cunea [Fall webworm moth]	AVP	0.678	0.322
dbAMP_12342	Nabaecin-3	Nasonia vitripennis [Parasitic wasp]	AVP	1	0
dbAMP_12343	Abaecin precursor	Apis mellifera [Honeybee]	AVP	0.64	0.36
dbAMP_12344	PP30	Pteromalus puparum	AVP	0.678	0.322

## Sheet: Species statistics
Source	AVP statistics
Bombyx mori [Silk moth]	19
Galleria mellonella [Greater wax moth]	14
Aedes aegypti [Yellowfever mosquito]	11
Pachycondyla goeldii [Ponerine ant]	11
Manduca sexta [Tobacco hawkmoth]	10
Drosophila melanogaster [Fruit fly]	9
Danaus plexippus [Monarch butterfly]	9
Anopheles gambiae [African malaria mosquito]	8
Apis mellifera [Honeybee]	8
Heliothis virescens [Tobacco budworm moth]	7
Nasonia vitripennis [Parasitic wasp]	7
Sarcophaga peregrina [Flesh fly]	6
Antheraea mylitta [Tasar silkworm]	6
Spodoptera exigua [beet armyworm ]	6
Antheraea pernyi [Chinese oak silk moth]	5
Myrmecia pilosula [Jack jumper ant]	5
Vespa magnifica [Hornet]	5
Aedes albopictus [Asian tiger mosquito]	5
Hyalophora cecropia [Cecropia moth]	5
Apis cerana japonica	5
Helicoverpa armigera [Cotton bollworm]	5
Hyphantria cunea [Fall webworm moth]	5
Acrocinus longimanus [Giant harlequin beetle]	4
Pteromalus puparum	4
Ceratitis capitata [Mediterranean fruit fly]	4
Megabombus pennsylvanicus [American common bumblebee]	4
Polistes dorsalis [Paper wasp]	4
Plutella xylostella [Diamondback moth]	4
Trichoplusia ni [Cabbage looper]	4
Drosophila simulans [Fruit fly]	4
Stomoxys calcitrans [Stable fly]	3
Oryctes rhinoceros [Coconut rhinoceros beetle]	3
Zophobas atratus [Giant mealworm beetle]	3
Spodoptera litura [Asian cotton leafworm]	3
Apis florea [Little honeybee]	3
Apis dorsata [Giant honeybee]	3
Lasioglossum laticeps	3
Harmonia axyridis [Multicolored Asian lady beetle]	3
Panurgus calcaratus	3
Papilio xuthus [Asian swallowtail butterfly]	3
Pseudoplusia includens [Soybean looper]	3
Anopheles arabiensis [Mosquito]	3
Musca domestica [House fly]	3
Megoura viciae [Vetch aphid]	3
Pseudacanthotermes spiniger	2
Rhodnius prolixus [Triatomid bug]	2
Lucilia sericata [Green bottle fly]	2
Myrmecia banksi [Jack jumper ant]	2
Dinoponera australis [Giant neotropical hunting ant]	2
Acalolepta luxuriosa [Udo longhorn beetle]	2
Macropis fulvipes	2
Apis mellifera [Honey bee]	2
Halictus sexcinctus	2
Culex pipiens pipiens [Northern house mosquito]	2
Artogeia rapae [Small white butterfly]	2
Drosophila virilis [Fruit fly]	2
Polybia paulista [Neotropical social wasp]	2
Drosophila yakuba [Fruit fly]	2
Polistes dominulus [European paper wasp]	2
Vespula vulgaris [Yellow jacket]	2
Acyrthosiphon pisum [Pea aphid]	2
Bombus ignitus [Bumblebee]	2
Anopheles merus [Mosquito]	2
Harpegnathos saltator [Jerdon's jumping ant]	2
Copris tripartitus	2
Anopheles melas	2
Drosophila subobscura [Fruit fly]	2
Drosophila pseudoobscura pseudoobscura [Fruit fly]	2
Pteropus alecto [Black flying fox]	2
Tribolium castaneum [Red flour beetle]	2
Holotrichia diomphalia [Korean black chafer]	2
Spodoptera exigua [Beet armyworm]	2
Anomala cuprea [Cupreous chafer beetle]	2
Hyblaea puera [Teak defoliator]	1
Phlebotomus duboscqi [Sandfly]	1
Phormia terranovae [Northern blowfly]	1
Locusta migratoria [Migratory locust]	1
Gastrophysa atrocyanea [Leaf beetle]	1
Spinus spinus [Eurasian siskin]&&Carduelis flammea [Common redpoll]	1
Protophormia terraenovae [Northern blowfly]	1
Tenebrio molitor [Yellow mealworm beetle]	1
Archaeoprepona demophon [One-spotted leafwing butterfly]	1
Eumenes rubrofemoratus [Solitary wasp]	1
Eumenes fraterculus [Solitary wasp]	1
Drosophila teissieri [Fruit fly]	1
Vespa crabro [European hornet]	1
Formica aquilonia [Red wood ant]	1
Bombus pascuorum [Common carder bumblebee]	1
Aeshna cyanea [Southern hawker dragonfly]	1
Haemaphysalis longicornis [Bush tick]	1
Osmia rufa [Red mason bee]	1
Melecta albifrons [Cuckoo bee]	1
Polistes hebraeus [Paper wasp]	1
Vespa magnifica [Hornet]&&Apis mellifera [Honeybee]&&Vespula maculifrons [Eastern yellow jacket]&&Vespa velutina nigrithorax [Hornet]	1
Drosophila simulans [Fruit fly]&&Drosophila melanogaster [Fruit fly]	1
Dinoponera quadriceps [South American ant]	1
Anoplius samariensis [Solitary wasp]	1
Cryptotympana dubia [Korean horse cicada]	1
Orancistrocerus drewseni [Solitary wasp]	1
Myrmecia gulosa [Red bulldog ant]	1
Podisus maculiventris [Spined soldier bug]	1
Musca domestica (house fly ) [House fly]	1
Sarcophaga peregrina [Flesh fly]&&Drosophila virilis [Fruit fly]	1
Drosophila sechellia [Fruit fly]&&Drosophila mauritiana [Fruit fly]	1
Paederus dermatitis	1
Drosophila mauritiana [Fruit fly]&&Drosophila simulans [Fruit fly]&&Drosophila teissieri [Fruit fly]&&Drosophila takahashii [Fruit fly]&&Drosophila orena [Fruit fly]&&Drosophila erecta [Fruit fly]&&Drosophila sechellia [Fruit fly]&&Drosophila yakuba [Fruit fly]	1
Riptortus clavatus [Bean bug]	1
Calliphora vicina [Blue blowfly]	1
Vespa tropica [Greater banded hornet]	1
Anterhynchium flavomarginatum micado [Solitary wasp]	1
Vespa bicolor	1
Protonectarina sylveirae [Brazilian wasp]	1
Tetramorium bicarinatum	1
Bombus lapidarius [Red-tailed bumblebee]	1
Vespa basalis [Hornet]	1
Sphodromantis viridis [Giant African praying mantis)]	1
Drosophila silvestris [Fruit fly]	1
Coptotermes formosanus [Formosan subterranean termite]	1
Manica rubida	1
Acromyrmex echinatior [Panamanian leafcutter ant]	1
Myrmica rubra&&Myrmica ruginodis [Red ant]&&Myrmica sulcinodis&&Myrmica fracticornis	1
Myrmica alaskensis&&Myrmica scabrinodis&&Myrmica brevispinosa&&Myrmica lobicornis&&Myrmica sabuleti&&Myrmica rugulosa	1
Apriona germari [Mulberry longhorn beetle]	1
Camponotus floridanus [Florida carpenter ant]	1
Bombyx mori [Silk moth]&&Bombyx mandarina [Wild silk moth]	1
Bombyx mandarina [Wild silk moth]	1
Solenopsis invicta [Red imported fire ant]	1
Trypoxylus dichotomus [Japanese rhinoceros beetle]	1
Culex quinquefasciatus [Southern house mosquito]&&Culex pipiens pipiens [Northern house mosquito]	1
Culex quinquefasciatus [Southern house mosquito]	1
Bactrocera dorsalis [oriental fruit fly ]	1
Anopheles arabiensis [Mosquito]&&Anopheles quadriannulatus [Mosquito]&&Anopheles melas	1
Anopheles bwambae&&Anopheles melas&&Anopheles merus [Mosquito]	1
Anopheles quadriannulatus [Mosquito]	1
Spodoptera littoralis [Egyptian cotton leafworm]	1
Anopheles albimanus [New world malaria mosquito]	1
Drosophila erecta [Fruit fly]	1
Plutella xylostella [diamondback moth ]	1
Polistes sp. [Golden paper wasp]	1
Periplaneta americana [American cockroach]	1
Sitophilus zeamais [Maize weevil]	1
Bombyx mori [Domestic silkworm]	1
Agrius convolvuli [Morning glory sphinx moth]	1
Bombus impatiens [Bumblebee]	1
Muscicapa striata [Spotted flycatcher]	1
Apis mellifera mellifera [German honeybee]	1
Anopheles stephensi [Indo-Pakistan malaria mosquito]	1
Drosophila orena [Fruit fly]	1
Triatoma infestans [Assassin bug]	1
Triatoma brasiliensis [Blood-sucking bug]	1
Oreumenes decoratus [Potter wasp]	1
Lonomia obliqua [Moth]	1
Oncopeltus fasciatus [Large milkweed bug]	1
Drosophila mauritiana [Fruit fly]	1
Drosophila sechellia [Fruit fly]	1
Bactrocera dorsalis [Oriental fruit fly]	1
Allomyrina dichotoma [Japanese rhinoceros beetle]	1
Apis mellifera carnica [Carniolan bee]	1
Bombus pascuorum [Brown bumblebee]	1
Glossina morsitans [tsetse fly]	1
Bombus terrestris [Buff-tailed bumblebee]	1
Samia ricini [Indian eri silkmoth]	1
